1 **PermaNet® Dual, a new deltamethrin-chlorfenapyr mixture net, shows improved efficacy**  
2 **against pyrethroid-resistant *Anopheles gambiae sensu lato* in southern Benin**

3  
4 Thomas Syme<sup>1,2,3\*</sup>, Boris N'dombidjé<sup>2,3</sup>, Martial Gbegbo<sup>2,3</sup>, Damien Todjinou<sup>2,3</sup>, Victoria Ariori<sup>2,3</sup>,  
5 Patricia De Vos<sup>4</sup>, Olivier Pigeon<sup>4</sup>, Corine Ngufor<sup>1,2,3\*</sup>

6  
7 <sup>1</sup>London School of Hygiene & Tropical Medicine, United Kingdom

8 <sup>2</sup>Centre de Recherche Entomologique de Cotonou, Benin

9 <sup>3</sup>Pan African Malaria Vector Research Consortium (PAMVERC), Benin

10 <sup>4</sup>Centre Walloon de Recherches Agronomiques (CRA-W), Belgium

11  
12 \*Corresponding authors

13 (CN) Email: [corine.ngufor@lshtm.ac.uk](mailto:corine.ngufor@lshtm.ac.uk)

14 (TS) Email: [Thomas.syme@lshtm.ac.uk](mailto:Thomas.syme@lshtm.ac.uk)

15  
16 **Key words:** *Insecticide-treated nets, chlorfenapyr, pyrethroid-chlorfenapyr, pyrethroid-PBO, vector*  
17 *control, PermaNet Dual, Interceptor G2, Anopheles gambiae, malaria, experimental huts, Covè*

18  
19 **Abstract**

20 Pyrethroid-chlorfenapyr nets have demonstrated improved entomological and epidemiological  
21 impact in trials across Africa. This is driving increased demand for this novel net class in malaria  
22 endemic countries. PermaNet® Dual is a new deltamethrin-chlorfenapyr net developed by  
23 Vestergaard Sàrl to provide more options to malaria control programmes. We performed an  
24 experimental hut trial to evaluate the efficacy of PermaNet® Dual against wild, free-flying  
25 pyrethroid-resistant *Anopheles gambiae sensu lato* in Covè, Benin. PermaNet® Dual induced superior  
26 levels of mosquito mortality compared to a pyrethroid-only net and a pyrethroid-piperonyl butoxide  
27 net both when unwashed (77% with PermaNet® Dual vs. 23% with PermaNet® 2.0 and 56% with  
28 PermaNet® 3.0,  $p < 0.001$ ) and after 20 standardised washes (75% with PermaNet® Dual vs. 14% with  
29 PermaNet® 2.0 and 30% with PermaNet® 3.0,  $p < 0.001$ ). Using a provisional non-inferiority margin  
30 defined by the World Health Organisation, PermaNet® Dual was also non-inferior to a pyrethroid-  
31 chlorfenapyr net that has demonstrated improved public health value (Interceptor® G2), for vector  
32 mortality (79% vs. 76%, OR=0.854, 95% CIs: 0.703–1.038) but not for blood-feeding protection (35%  
33 vs. 26%, OR=1.445, 95% CIs: 1.203–1.735). PermaNet® Dual presents an additional option of this  
34 highly effective net class for improved control of malaria transmitted by pyrethroid-resistant  
35 mosquitoes.

36

37

## 38 **Background**

39 Insecticide-treated nets (ITNs) are the most effective and widely adopted preventive measure  
40 against malaria. They have been consistently shown to reduce malaria morbidity and mortality  
41 under trial [1] and programmatic conditions [2], and have made the largest contribution of any  
42 intervention to recent reductions in malaria [3]. Their reliance however, on a single insecticide class  
43 – the pyrethroids – has exerted selective pressure favouring the spread of pyrethroid resistance in  
44 malaria vectors. Between 2010–2020, 88% of malaria-endemic countries detected pyrethroid  
45 resistance in at least one vector species [4]. Although studies show that ITNs remain protective  
46 against malaria infection despite resistance [5], a substantial body of evidence documents increased  
47 survival and blood-feeding of mosquitoes exposed to pyrethroid ITNs [6-9]. Given their importance  
48 in malaria prevention and control, any further loss in ITN effectiveness could contribute to  
49 resurgences in cases and deaths.

50 In response to this threat, dual-active ingredient ITNs combining a pyrethroid with another  
51 compound designed to restore control of pyrethroid-resistant malaria vectors have been developed.  
52 The first novel ITN type combines pyrethroids with piperonyl butoxide (PBO); a synergist that  
53 enhances pyrethroid efficacy by neutralising detoxifying enzymes associated with pyrethroid  
54 resistance [10]. Pyrethroid-PBO ITNs have shown improved entomological and epidemiological  
55 efficacy compared to pyrethroid-only ITNs in experimental hut [11-15] and cluster-randomised  
56 controlled trials (cRCTs) [16, 17]. They have since received a conditional recommendation from WHO  
57 for distribution in areas where vectors exhibit pyrethroid resistance leading to a significant increase  
58 in their deployment in endemic countries in recent years [18]. Pyrethroid-PBO ITNs are not however,  
59 without limitations. Notably, there are concerns over their durability following long-term household  
60 use [19]. Experimental hut trials in West Africa also suggest that pyrethroid-PBO ITNs may offer  
61 more limited benefits in areas with elevated pyrethroid resistance mediated by complex and  
62 multiple mechanisms [20]. More ITN types, ideally containing other novel insecticides to which  
63 vectors are susceptible are thus needed, for effective and sustainable vector control.

64 More recently, ITNs combining pyrethroids with chlorfenapyr, a pyrrole insecticide that disrupts  
65 mitochondrial function, have become available. Chlorfenapyr represents a new mode of action for  
66 public health which is suited for the control of vectors that have developed complex mechanisms of  
67 resistance to current insecticides. A pyrethroid-chlorfenapyr ITN developed by BASF (Interceptor®  
68 G2) has been prequalified by WHO [21], after demonstrating improved control of pyrethroid-  
69 resistant malaria vectors in experimental hut trials in Benin [22], Burkina Faso [23], Côte d'Ivoire [24]  
70 and Tanzania [25, 26]. Evidence of epidemiological impact is also emerging from large-scale trials  
71 and pilot distribution schemes in several countries. Most notably, cRCTs in Benin [27] and Tanzania  
72 [28] showed that Interceptor® G2 reduced child malaria incidence by 46% and 44% respectively over  
73 2 years relative to standard pyrethroid-only ITNs. Pyrethroid-chlorfenapyr ITNs are soon expected to  
74 receive a WHO endorsement and policy recommendation, pending proof of improved public health  
75 impact from a second ongoing cRCT in Benin [29]. This is driving a substantial global increase in  
76 demand and order volumes for pyrethroid-chlorfenapyr ITNs for deployment in endemic countries  
77 [30]. The development of more innovative varieties of effective pyrethroid-chlorfenapyr nets from  
78 multiple manufacturers with robust production capacity, will help improve the health of the ITN  
79 market, increasing competition and leading to improved access to more affordable ITN products for  
80 optimal vector control impact [31].

81 PermaNet® Dual is a new deltamethrin-chlorfenapyr ITN developed by Vestergaard Sàrl. Recognising  
82 the prohibitive cost and time investment required to conduct cRCTs, to be prequalified by WHO and  
83 enter the ITN market successfully, PermaNet® Dual must be subjected to semi-field trials to establish  
84 its entomological superiority over standard pyrethroid-only ITNs. [32, 33]. It is also expected to  
85 demonstrate non-inferiority to a pyrethroid-chlorfenapyr ITN that has shown empirical evidence of  
86 improved public health value. To generate efficacy data as part of a PermaNet® Dual dossier  
87 submission for assessment by the Prequalification Unit Vector Control Product Assessment Team  
88 (PQT/VCP), we performed an experimental hut study to evaluate its efficacy and wash-resistance  
89 against wild, free-flying pyrethroid-resistant *Anopheles gambiae sensu lato (s.l.)* in Benin. PermaNet®  
90 Dual was tested unwashed and after 20 standardised washes and compared to three types of WHO  
91 prequalified ITNs; a pyrethroid-only net (PermaNet® 2.0), a pyrethroid-PBO net (PermaNet® 3.0) and  
92 a pyrethroid-chlorfenapyr net (Interceptor® G2). Data was analysed to assess the non-inferiority of  
93 PermaNet® Dual to Interceptor® G2 following a recent provisional WHO protocol [32]. The  
94 susceptibility of the vector population at the experimental hut site to the insecticides used in the  
95 ITNs was assessed during the trial using WHO bottle bioassays. Net pieces cut from ITNs before and  
96 after the hut trial were also tested in laboratory bioassays and analysed for chemical content.  
97 Following WHO PQT/VCP data requirements, the trial was performed in line with the Organisation  
98 for Economic Cooperation and Development (OECD) principles of good laboratory practice (GLP) at  
99 the CREC/LSHTM GLP-certified facility in Benin.

100

## 101 **Methods**

### 102 **WHO bottle bioassays**

103 WHO bottle bioassays [34] were performed using F1 progeny of field-collected *Anopheles gambiae*  
104 *s.l.* to assess the susceptibility of the vector population at the experimental hut station to the active  
105 ingredients used in the ITNs. Mosquitoes were exposed to the discriminating concentrations of  
106 deltamethrin (12.5 µg) and chlorfenapyr (100 µg). Additional exposures were performed with 2x (25  
107 µg), 5x (62.5 µg) and 10x (125 µg) the discriminating concentration of deltamethrin to determine  
108 pyrethroid resistance intensity during the trial. To assess synergism and the contribution of  
109 cytochrome P450 monooxygenases to pyrethroid resistance, mosquitoes were also pre-exposed to  
110 PBO (400 µg) prior to deltamethrin-coated bottles (12.5 µg). Stock solutions for each insecticide  
111 were prepared by dissolving technical grade insecticide in acetone. Test bottles were coated by  
112 introducing 1 ml of stock solution into bottles and rotating manually. Approximately 100, unfed, 3–  
113 5-day old mosquitoes were exposed to each insecticide and dose for 60 mins in four batches of 25.  
114 Similar numbers of mosquitoes were concurrently exposed to acetone and PBO-coated bottles as  
115 controls. Knockdown was recorded after exposure and mosquitoes were transferred to labelled  
116 cups, provided access to 10% (w/v) glucose solution *ad libitum* and held at 27±2°C and 75±10%  
117 relative humidity (RH). Mortality was recorded after 24 h for deltamethrin and every 24 h up to 72 h  
118 for chlorfenapyr.

### 119 **Experimental hut trial**

120 Experimental hut trials are standardised simulations of human-occupied housing designed to  
121 evaluate the efficacy of indoor vector control interventions against wild, free-flying mosquitoes

122 under controlled field conditions. Host-seeking mosquitoes enter huts at night following attraction  
123 by odour cues emanating from human volunteers sleeping inside. Mosquitoes entering the huts then  
124 interact freely with the human host and vector control intervention and in the morning, they are  
125 collected and scored for physiological and behavioural parameters. The malaria control potential of  
126 vector control interventions is assessed primarily in terms of their ability to induce vector mortality  
127 (transmission control) and prevent blood-feeding (personal protection).

## 128 **Study site and experimental huts**

129 The experimental hut trial was conducted at the CREC/LSHTM field station in Covè, southern Benin  
130 (7°14'N2°18'E). The site is located in a vast area of rice irrigation which provides extensive and  
131 permanent mosquito breeding sites. *An. coluzzii* and *An. gambiae sensu stricto* (s.s.) occur  
132 sympatrically with the former predominating. Recent studies show a high frequency and intensity of  
133 pyrethroid and organochlorine resistance but susceptibility to carbamates, organophosphates and  
134 pyrroles [35]. Genotyping and gene expression studies have revealed that pyrethroid resistance is  
135 mediated by a high frequency of the knockdown resistance (*kdr*) L1014F mutation and  
136 overexpression of cytochrome P450 monooxygenases [36]. Experimental huts used were of West  
137 African design, constructed from concrete bricks with cement-plastered walls, a corrugated iron roof  
138 and a polyethylene ceiling. Mosquitoes entered via four window slits with a 1 cm opening positioned  
139 on two sides of the hut. A wooden-framed veranda projected from the rear wall of each hut to  
140 capture exiting mosquitoes. Huts were surrounded by a water-filled moat to preclude mosquito  
141 predators.

## 142 **Experimental hut treatments**

143 PermaNet® Dual, was compared to three other WHO pre-qualified ITNs; a pyrethroid-only net  
144 (PermaNet® 2.0), a pyrethroid-PBO net (PermaNet® 3.0), and a pyrethroid-chlorfenapyr net  
145 (Interceptor® G2). A description of the different ITNs tested in the trial is provided below.

- 146 • PermaNet® Dual (Vestergaard Sàrl) is a candidate 100-denier, polyester ITN coated with a  
147 combination of deltamethrin and chlorfenapyr at 2.1 g/kg and 5 g/kg respectively.
- 148  
149 • Interceptor® G2 (BASF) is a WHO-prequalified 100-denier, polyester ITN coated with a  
150 combination of alpha-cypermethrin and chlorfenapyr at 2.4 g/kg and 4.8 g/kg respectively.
- 151  
152 • PermaNet® 3.0 (Vestergaard Sàrl) is a WHO-prequalified ITN. The roof panel is made of 100-  
153 denier, polyethylene monofilament incorporating a combination of deltamethrin and PBO at 4  
154 g/kg and 25 g/kg respectively. The side panels are made of 100-denier, polyester multifilament  
155 coated with deltamethrin at 2.1 g/kg.
- 156  
157 • PermaNet® 2.0 (Vestergaard Sàrl) is a WHO-prequalified polyester ITN coated with deltamethrin  
158 at 1.4 g/kg.

159  
160 An untreated polyester net developed to a similar technical specification as PermaNet® Dual was  
161 also tested as a negative control.

162  
163 All ITNs were tested unwashed and washed 20 times as a proxy for insecticidal loss over 3 years of  
164 field use, as per WHO guidelines [37]. Nets were erected in huts by tying the four edges of the roof  
165 panel to nails positioned at the upper corners of hut walls. Nets were given 6 holes each measuring 4  
166 x 4 cm to mimic wear-and-tear from routine use. Nine treatments arms were evaluated in nine  
167 experimental huts as follows:  
168

- 169 1. Untreated polyester net (negative control)
- 170 2. PermaNet® 2.0 – unwashed (deltamethrin only)
- 171 3. PermaNet® 2.0 – washed 20x
- 172 4. PermaNet® 3.0 – unwashed (roof: deltamethrin plus PBO; sides: deltamethrin only)
- 173 5. PermaNet® 3.0 – washed 20x
- 174 6. Interceptor® G2 – unwashed (alpha-cypermethrin plus chlorfenapyr)
- 175 7. Interceptor® G2 – washed 20x
- 176 8. PermaNet® Dual – unwashed (deltamethrin plus chlorfenapyr)
- 177 9. PermaNet® Dual – washed 20x

## 178 **Experimental hut trial procedure**

179 Human volunteers slept in huts between 21:00–06:00 to attract wild, free-flying mosquitoes. Each  
180 morning, volunteers collected all mosquitoes from the different compartments of the hut (under the  
181 net, room, veranda) using a torch and aspirator and placed them in labelled plastic cups. Mosquito  
182 collections were then transferred to the field laboratory for morphological identification and scoring  
183 of immediate mortality and blood-feeding. Surviving, female *An. gambiae s.l.* were provided access  
184 to 10% glucose (w/v) solution and held at ambient conditions. Delayed mortality was recorded every  
185 24 h up to 72 h to account for the delayed action of chlorfenapyr. Mosquito collections were  
186 performed 6 days per week and on the 7th day, huts were cleaned and aired to prevent  
187 contamination before the next rotation cycle. Sleepers were rotated between huts daily while  
188 treatments were rotated weekly to mitigate the impact of variable host and hut positional  
189 attractiveness on mosquito entry. Six replicate nets were also used per treatment and rotated within  
190 the treatment daily. The trial continued for one full treatment rotation (9 weeks) between  
191 November 2020 and January 2021.

## 192 **Experimental hut trial outcome measures**

193 The efficacy of the experimental hut treatments was expressed in terms of the following outcome  
194 measures:

- 195 1. **Hut entry** – number of female mosquitoes collected in experimental huts
- 196 2. **Deterrence (%)** – reduction in the number of mosquitoes collected in the treated hut relative to  
197 the untreated control hut. Calculated as follows:  
198

$$199 \text{ Deterrence (\%)} = \frac{100(T_u - T_t)}{T_u}$$

200 Where  $T_u$  is the number of mosquitoes collected in the untreated control hut and  $T_t$  is the  
201 number of mosquitoes collected in the treated hut.

- 202 3. **Exophily (%)** – exiting rates due to potential irritant effects of a treatment expressed as the  
203 proportion of mosquitoes collected in the veranda
- 204 4. **Blood-feeding (%)** – proportion of blood-fed mosquitoes
- 205 5. **Blood-feeding inhibition (%)** – proportional reduction in blood-feeding in the treated hut  
206 relative to the untreated control hut. Calculated as follows:  
207

$$208 \text{ Blood feeding inhibition (\%)} = \frac{100(B_{fu} - B_{ft})}{B_{fu}}$$

209 Where  $B_{fu}$  is the proportion of blood-fed mosquitoes in the untreated control hut and  $B_{ft}$  is the  
210 proportion of blood-fed mosquitoes in the treated hut.

211 **6. Personal protection (%)** – reduction in the number of blood-fed mosquitoes in the treated hut  
212 relative to the untreated control hut. Calculated as follows:  
213

$$214 \text{ Personal protection (\%)} = \frac{100(B_u - B_t)}{B_u}$$

215 Where  $B_u$  is the number of blood-fed mosquitoes in the untreated control hut and  $B_t$  is the  
216 number of blood-fed mosquitoes in the treated hut.

217 **7. Delayed mortality (%)** – proportion of dead mosquitoes observed every 24 h up to 72 h after  
218 collection

219 **8. Overall killing effect (%)** – number of mosquitoes killed in the treated hut relative to the number  
220 collected in the untreated control hut. Calculated as follows:  
221

$$222 \text{ Overall killing effect (\%)} = \frac{100(K_t - K_u)}{T_u}$$

222 Where  $K_t$  is the number of dead mosquitoes in the treated hut,  $K_u$  is the number of dead  
223 mosquitoes in the untreated control hut and  $T_u$  is the number of mosquitoes collected in the  
224 untreated control hut.

## 226 **Preparation of net pieces for bioassays and chemical analysis**

227 For each ITN type, a total of 5 net pieces (one from each panel) measuring 30 x 30 cm were cut  
228 before and after the hut trial from randomly selected unwashed and washed nets. Because of the  
229 mosaic design of PermaNet® 3.0, two additional net pieces were cut from the roof panel to provide 7  
230 pieces in total and a representative sample of pyrethroid-PBO incorporated pieces as per WHO  
231 recommendation [38]. Net pieces were wrapped in labelled aluminium foil and stored at 30°C before  
232 and between use for supplementary cone bioassays and tunnel tests. Following use in laboratory  
233 bioassays, net pieces were stored at 4°C before being sent for chemical analysis of insecticide  
234 content at the Centre Walloon de Recherches Agronomiques (CRA-W), Belgium.

## 235 **Supplementary laboratory bioassays**

236 To provide supplementary data on ITN efficacy, laboratory cone bioassays and tunnel tests were  
237 performed with net pieces cut from unwashed and washed ITNs before and after the hut trial. Cone  
238 bioassays were performed with the susceptible *An. gambiae s.s.* Kisumu strain to assess the  
239 pyrethroid component of ITNs, while tunnel tests were performed with the pyrethroid-resistant *An.*  
240 *gambiae s.l.* Covè strain to assess the chlorfenapyr components of PermaNet® Dual and Interceptor®  
241 G2.

- 242 • *An. gambiae s.s.* Kisumu strain is an insecticide-susceptible reference strain originated from  
243 Kisumu, western Kenya.
- 244 • *An. gambiae s.l.* Covè strain are F1 progeny of mosquitoes collected from the experimental hut  
245 site in Covè, southern Benin. It is highly resistant to pyrethroids and organochlorines but  
246 susceptible to other insecticide classes including chlorfenapyr. Resistance is mediated by the *kdr*  
247 L1014F mutation and overexpression of cytochrome P450 monooxygenases [36].  
248

249 All net pieces cut from unwashed and washed ITNs before and after the hut trial were tested in cone  
250 bioassays against the susceptible *An. gambiae s.s.* Kisumu strain. Approximately 10, 2–5-day old  
251 mosquitoes were exposed to each net piece for 3 mins in two replicate cones containing ~5  
252 mosquitoes thus giving a total of ~50 mosquitoes per treatment arm. After exposure, mosquitoes  
253 were transferred to labelled cups, provided access to 10% (w/v) glucose solution and held at 27±2°C  
254 and 75±10% RH. Knockdown was recorded after 60 mins and delayed mortality every 24 h up to 72  
255 h.

256 Previous studies demonstrate the inability of cone bioassays to predict the field efficacy of  
257 chlorfenapyr-based ITNs [39]. To assess the efficacy of the chlorfenapyr component of the  
258 pyrethroid-chlorfenapyr nets, we therefore performed tunnel tests against the pyrethroid-resistant  
259 Covè with two net pieces randomly selected from those cut from unwashed and washed PermaNet®  
260 2.0, Interceptor® G2 and PermaNet® Dual before and after the hut trial. Tunnel tests are an  
261 experimental chamber that mimics the behavioural interactions that occur between free-flying  
262 mosquitoes and nets during host-seeking. The design consists of a square glass tunnel divided one  
263 third its length by a wooden frame fitted with a net sample. In the short section of the tunnel, a  
264 guinea pig bait was held in an open-meshed cage while in the long section, approximately 100, 5–8-  
265 day old mosquitoes were released at dusk and left overnight. Net samples were given 9 holes  
266 measuring 1 cm in diameter to facilitate entry of mosquitoes into the baited chamber. In the  
267 morning, mosquitoes were collected from the tunnel and scored for mortality and blood-feeding.  
268 Surviving mosquitoes were placed in labelled plastic cups, provided access to 10% (w/v) glucose  
269 solution, and held at 27±2°C and 75±10% RH. Delayed mortality was recorded every 24 h up to 72 h.  
270 Similar numbers of mosquitoes were concurrently exposed to untreated net pieces in cone bioassays  
271 and tunnel tests as a negative control.

## 272 **Chemical analysis of net pieces**

273 Following use in bioassays, all net pieces cut from the selected unwashed and washed ITNs before  
274 and after the experimental hut trial were assessed for deltamethrin, alpha-cypermethrin,  
275 chlorfenapyr and PBO content.

276 Deltamethrin and/or chlorfenapyr in PermaNet® Dual, PermaNet® 2.0 and PermaNet® 3.0 (sides)  
277 were extracted from net samples by sonication with heptane using dicyclohexyl phthalate as internal  
278 standard and determined by normal phase High Performance Liquid Chromatography with UV Diode  
279 Array Detection (HPLC-DAD). Alpha-cypermethrin and chlorfenapyr in Interceptor® G2 were  
280 extracted from net samples by sonication with heptane using dicyclohexyl phthalate as internal  
281 standard and determined by Gas Chromatography with Flame Ionisation Detection (GC-FID).

282 Deltamethrin in PermaNet® 3.0 (roof) was extracted from net samples by heating under reflux for 30  
283 minutes with xylene using dicyclohexyl phthalate as internal standard. The solvent was evaporated,  
284 and the residue dissolved in hexane. Deltamethrin was determined by normal phase High  
285 Performance Liquid Chromatography with UV Diode Array Detection (HPLC-DAD). PBO in PermaNet®  
286 3.0 roof was extracted from net samples by heating under reflux for 30 minutes with xylene using  
287 octadecane as internal standard and determined by Gas Chromatography with Flame Ionisation  
288 Detection (GC-FID).

289 Each method of analysis was performed using the internal standard calibration. The analytical  
290 methods used were based on validated and standardized methods published by the Collaborative

291 International Pesticides Analytical Council (CIPAC). Chemical analysis results were used to calculate  
292 proportional retention of active ingredient(s) and synergist after 20 washes.

### 293 **Data analysis**

294 Proportional outcomes (mortality, blood-feeding, exophily) were compared between the  
295 experimental hut treatments using blocked logistic regression while numerical outcomes (entry)  
296 were compared with negative binomial regression. A separate model was fitted for each outcome  
297 and adjusted to account for variation between the huts, sleepers and weeks of the trial. In addition,  
298 following recent provisional WHO guidance [40], PermaNet® Dual was assessed for its non-inferiority  
299 to Interceptor® G2 and its superiority to PermaNet® 2.0 and PermaNet® 3.0 for mosquito mortality  
300 and blood-feeding outcomes. Results with unwashed and washed nets were pooled to generate a  
301 single efficacy estimate over the lifetime of the net. All analyses were performed in Stata version 17.

### 302 **Ethical considerations**

303 Ethical approval for the study was issued by the Research Ethics Committees of the Benin Ministry of  
304 Health (Ref: N°34, 09/09/2020) and the London School of Hygiene & Tropical Medicine (LSHTM) (Ref:  
305 26429). Written informed consent was obtained from all human volunteer sleepers prior to  
306 participation. Sleepers were offered a free course of chemoprophylaxis spanning the duration of the  
307 study and 4 weeks following its completion to mitigate malaria infection risk. Approval for use of  
308 guinea pigs for tunnel tests was obtained from the LSHTM Animal Welfare Ethics Review Board (Ref:  
309 2020-01). Guinea pig colonies were maintained at CREC/LSHTM according to standard operating  
310 procedures (SOPs) developed in line with relevant national and international regulations governing  
311 use of animals for scientific research purposes.

### 312 **Compliance with OECD principles of Good Laboratory Practice**

313 To ensure compliance with the OECD principles of GLP, a series of activities were implemented  
314 through the initiation, execution, and reporting of the study. The study protocol was developed by a  
315 properly trained study director and approved by the sponsor before starting the study. Equipment  
316 used for the study (precision balances for weighing insecticides, refrigerators for ITN sample storage  
317 and data loggers) were calibrated before use. All ITN products used in the hut trial were verified to  
318 be within their expiry dates and were provided with associated certificates of analysis. The candidate  
319 net supplied by the manufacturer (Vestergaard Sàrl) was confirmed to come from three production  
320 batches. In addition, the environmental conditions under which these products were stored was  
321 verified daily by use of a calibrated data logger. Mosquitoes used for cone bioassays and tunnel tests  
322 were reared and transported in line with established SOPs that ensured the integrity of the strains  
323 tested. All computer systems (data loggers, databases, statistical software) used for data collection,  
324 entry, and processing, were validated before use. Records were kept of each procedure performed  
325 during the study. The quality assurance team of the CREC/LSHTM Facility performed inspections of  
326 the study protocol, critical phases of implementation, data quality and final report to assess  
327 compliance to GLP and no non-conformances were detected. The final report, along with all study-  
328 related documents, are securely stored in the physical and electronic archive of the Facility for up to  
329 15 years. Study inspections performed in 2021 by the South African National Accreditation System  
330 (SANAS), the GLP certification body of the Facility, also detected no non-conformances.

331



## 332 Results

### 333 WHO bottle bioassay results

334 Mortality of wild pyrethroid-resistant *An. gambiae s.l.* from the Covè hut station following exposure  
335 to the discriminating concentration of deltamethrin was 28% thus confirming the high frequency of  
336 pyrethroid resistance in the Covè vector population (Figure 1). Mortality increased progressively  
337 with 2x (76%), 5x (96%) and 10x (96%) the discriminating concentration but failed to exceed 98%  
338 with any concentration, indicating high intensity deltamethrin resistance. Pre-exposure to PBO fully  
339 restored deltamethrin susceptibility (100% mortality) thus suggesting the involvement of  
340 cytochrome P450 monooxygenases in pyrethroid resistance. In contrast, chlorfenapyr-treated  
341 bottles killed 98% of mosquitoes, indicating full susceptibility to this insecticide. No mortality was  
342 recorded in the untreated controls while PBO alone induced 3% mortality.

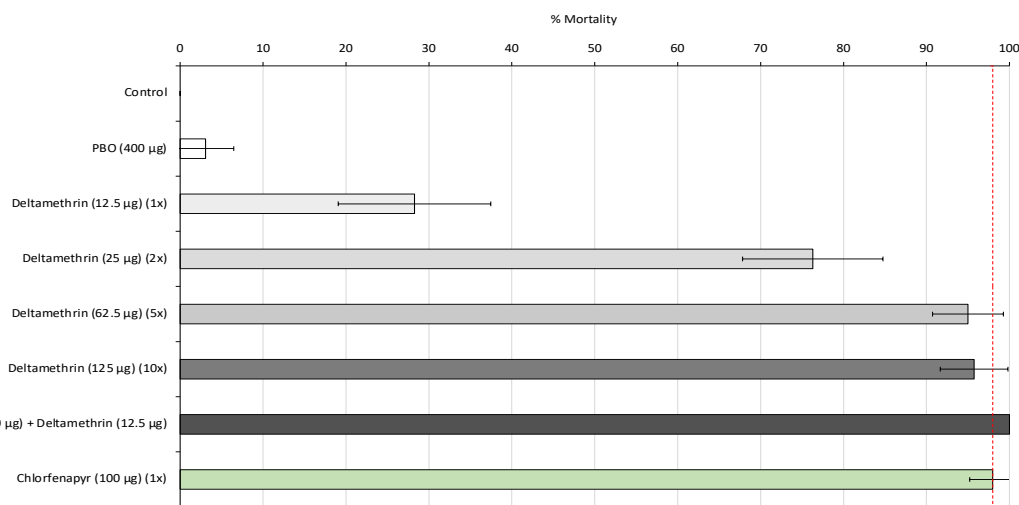

343

344 **Figure 1:** Mortality of F1 progeny of field-collected *Anopheles gambiae sensu lato* in World Health  
345 Organisation bottle bioassays. A total of 80–100 mosquitoes were exposed to each treatment arm for  
346 60 mins in four batches of 20–25. Dashed red line represents 98% susceptibility cut-off and error bars  
347 represent 95% CIs.

### 348 Experimental hut results

#### 349 Entry and exiting results

350 A total of 5,967 mosquitoes were collected in experimental huts over the 9-week trial,  
351 corresponding to an average of approximately 13 mosquitoes per treatment per night (Table 1).  
352 None of the ITNs induced a significant deterrent effect relative to the untreated control net and  
353 mosquito entry increased significantly with all net types after washing. All ITNs induced significant  
354 exiting relative to the control except PermaNet® 2.0 after 20 washes (36% vs. 38%,  $p=0.584$ ). Exiting  
355 was higher with all three dual ITN-types both when unwashed (63%-70%) and after 20 washes (56%-  
356 61%) compared to PermaNet® 2.0 (unwashed: 51%, washed: 36%). Mosquito exiting rates did not  
357 differ significantly between PermaNet® Dual and Interceptor® G2 or PermaNet® 3.0 both with  
358 unwashed nets and nets washed 20 times ( $p>0.05$ ). Exiting rates generally declined after washing for  
359 all net types except Interceptor® G2 (67% vs. 61%,  $p=0.205$ ).

360 **Table 1:** Entry and exiting of wild, free-flying, pyrethroid-resistant *Anopheles gambiae sensu lato*  
 361 entering experimental huts in Covè, southern Benin.

| Net type        | Net status | Total females caught* | % Deterrence | Total exiting | % Exophily*         | 95% CIs   |
|-----------------|------------|-----------------------|--------------|---------------|---------------------|-----------|
| Untreated net   | –          | 541 <sup>a</sup>      | –            | 208           | 38.4 <sup>a</sup>   | 34.3–42.5 |
| PermaNet® 2.0   | Unwashed   | 490 <sup>ab</sup>     | 9.4          | 248           | 50.6 <sup>b</sup>   | 46.2–55.0 |
|                 | Washed 20x | 903 <sup>c</sup>      | -66.9        | 329           | 36.4 <sup>a</sup>   | 33.3–39.6 |
| PermaNet® 3.0   | Unwashed   | 591 <sup>bd</sup>     | -9.2         | 412           | 69.7 <sup>c</sup>   | 66.0–73.4 |
|                 | Washed 20x | 895 <sup>c</sup>      | -65.4        | 541           | 60.4 <sup>d</sup>   | 57.2–63.7 |
| Interceptor® G2 | Unwashed   | 623 <sup>de</sup>     | -15.2        | 418           | 67.1 <sup>ce</sup>  | 63.4–70.8 |
|                 | Washed 20x | 669 <sup>cd</sup>     | -23.7        | 411           | 61.4 <sup>def</sup> | 57.7–65.1 |
| PermaNet® Dual  | Unwashed   | 459 <sup>a</sup>      | 15.2         | 291           | 63.4 <sup>cf</sup>  | 59.0–67.8 |
|                 | Washed 20x | 796 <sup>ce</sup>     | -47.1        | 444           | 55.8 <sup>d</sup>   | 52.3–59.3 |

362 \*Values in the same column bearing the same letter do not differ significantly at the 5% level according to logistic  
 363 regression analysis

### 364 **Blood-feeding results**

365 All ITNs significantly reduced blood-feeding relative to the control net except PermaNet® 2.0 washed  
 366 20 times (57% vs. 49%,  $p=0.471$ ) (Figure 2, Table 2). Between unwashed nets, lowest blood-feeding  
 367 was observed with PermaNet® 3.0 when unwashed (13%) though this increased significantly after  
 368 washing (30%,  $p<0.001$ ). Interceptor® G2 induced lower levels of mosquito feeding compared to  
 369 PermaNet® Dual both before washing (20% vs. 27%,  $p=0.03$ ) and after washing (32% vs. 39%,  
 370  $p=0.006$ ). Personal protection levels were similar between the pyrethroid-chlorfenapyr nets (52% vs.  
 371 54%) when unwashed and declined substantially with both net types after 20 washes albeit to a  
 372 greater extent with PermaNet® Dual. Nevertheless, PermaNet® Dual provided more blood-feeding  
 373 inhibition compared to PermaNet® 2.0 before washing (45% vs. 21%) and after 20 washes (21% vs. -  
 374 16.5%) (Table 2). For all ITN-types blood-feeding rates were significantly higher with washed nets  
 375 compared to unwashed nets ( $p<0.05$ ).

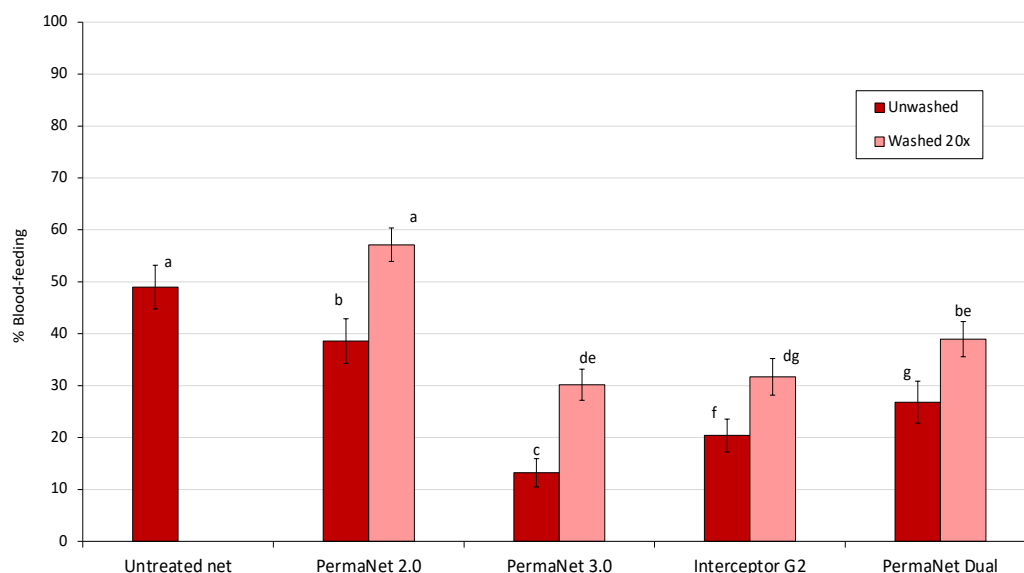

376

377 **Figure 2:** Blood-feeding of wild, free-flying, pyrethroid-resistant *Anopheles gambiae sensu lato*  
 378 entering experimental huts in Covè, southern Benin. Bars bearing the same letter do not differ  
 379 significantly at the 5% level according to logistic regression analysis. Error bars represent 95% CIs.

380 **Table 2:** Blood-feeding of wild, free-flying, pyrethroid-resistant *Anopheles gambiae sensu lato*  
 381 entering experimental huts in Covè, southern Benin.

| Net type        | Net status | Total females caught* | Total blood-fed | % Blood-feeding*   | 95% CIs   | % Blood-feeding inhibition | % Personal protection |
|-----------------|------------|-----------------------|-----------------|--------------------|-----------|----------------------------|-----------------------|
| Untreated net   | –          | 541 <sup>a</sup>      | 265             | 49.0 <sup>a</sup>  | 44.8–53.2 | –                          | –                     |
| PermaNet® 2.0   | Unwashed   | 490 <sup>ab</sup>     | 189             | 38.6 <sup>b</sup>  | 34.3–42.9 | 21.3                       | 28.7                  |
|                 | Washed 20x | 903 <sup>c</sup>      | 516             | 57.1 <sup>a</sup>  | 53.9–60.4 | -16.7                      | -94.7                 |
| PermaNet® 3.0   | Unwashed   | 591 <sup>bd</sup>     | 78              | 13.2 <sup>c</sup>  | 10.5–15.9 | 73.1                       | 70.6                  |
|                 | Washed 20x | 895 <sup>c</sup>      | 270             | 30.2 <sup>de</sup> | 27.2–33.2 | 38.4                       | -1.9                  |
| Interceptor® G2 | Unwashed   | 623 <sup>de</sup>     | 127             | 20.4 <sup>f</sup>  | 17.2–23.5 | 58.4                       | 52.1                  |
|                 | Washed 20x | 669 <sup>cd</sup>     | 212             | 31.7 <sup>dg</sup> | 28.2–35.2 | 35.3                       | 20.0                  |
| PermaNet® Dual  | Unwashed   | 459 <sup>a</sup>      | 123             | 26.8 <sup>g</sup>  | 22.7–30.8 | 45.3                       | 53.6                  |
|                 | Washed 20x | 796 <sup>ce</sup>     | 310             | 38.9 <sup>be</sup> | 35.6–42.3 | 20.5                       | -17.0                 |

382 \*Values in the same column bearing the same letter do not differ significantly at the 5% level according to logistic  
 383 regression analysis

### 384 Mortality results

385 Mortality of wild free-flying pyrethroid-resistant *An. gambiae s.l.* with the untreated control net was  
 386 2% (Figure 3, Table 3). Among the ITNs, lowest mosquito mortality was achieved with PermaNet® 2.0  
 387 (unwashed: 23%, washed: 14%). PermaNet® 3.0 induced higher mortality than PermaNet® 2.0 both  
 388 with unwashed nets (56% vs. 23%,  $p < 0.001$ ) and nets washed 20 times (30% vs. 14%,  $p < 0.001$ ).  
 389 Mortality decreased significantly after washing with both PermaNet® 2.0 (23% vs. 14%,  $p = 0.002$ ) and  
 390 PermaNet® 3.0 (56% vs. 30%,  $p < 0.001$ ). The pyrethroid-chlorfenapyr nets induced significantly higher  
 391 levels of mosquito mortality (76%–83% when unwashed and 75% with both net types after 20  
 392 washes) compared to PermaNet® 2.0 and PermaNet® 3.0 ( $p < 0.001$ ). Interceptor® G2 induced higher  
 393 vector mortality than PermaNet® Dual when unwashed (83% vs. 76%,  $p = 0.019$ ) but similar mortality  
 394 after 20 washes (75% vs. 75%,  $p = 0.865$ ). While a significant decline in vector mortality was observed  
 395 with Interceptor® G2 after 20 washes (83% to 75%,  $p = 0.002$ ), the levels of mortality achieved with  
 396 PermaNet® Dual remained the same after washing (76% vs. 75%,  $p = 0.684$ ).

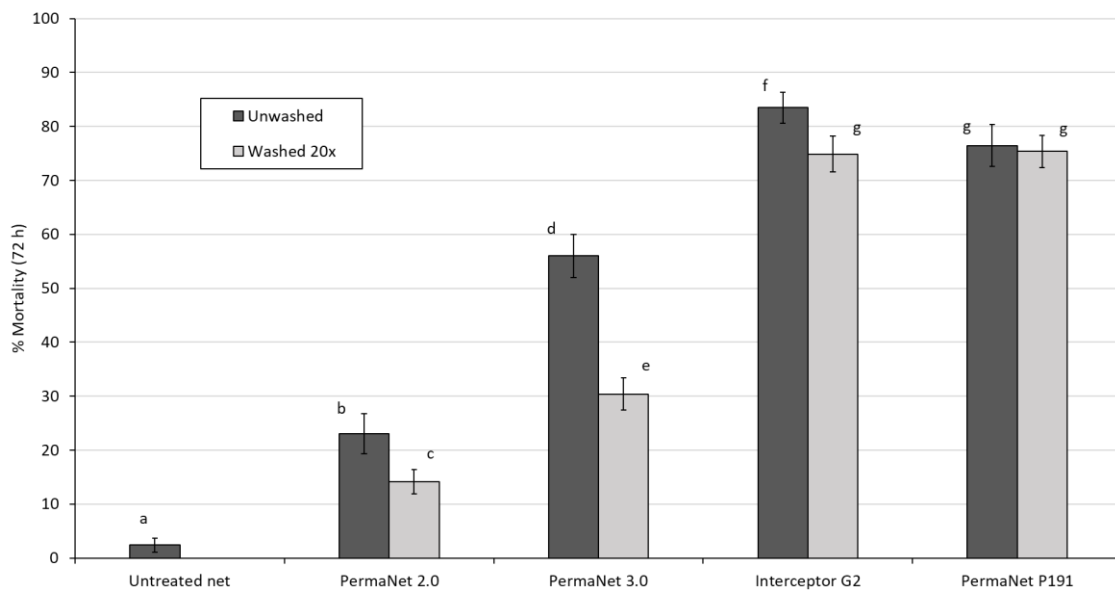

397 **Figure 3:** Mortality (72 h) of wild, free-flying, pyrethroid-resistant *Anopheles gambiae sensu lato*  
 398 entering experimental huts in Covè, southern Benin. Bars bearing the same letter do not differ  
 399 significantly at the 5% level according to logistic regression analysis. Error bars represent 95% CIs.  
 400

401 **Table 3:** Mortality of wild, free-flying, pyrethroid-resistant *Anopheles gambiae* sensu lato entering  
 402 experimental huts in Covè, southern Benin.

| Net type                    | Net status | Total females caught* | Total 72 h mortality | % 72 h Mortality* | 95% CIs   | % Overall killing effect |
|-----------------------------|------------|-----------------------|----------------------|-------------------|-----------|--------------------------|
| Untreated net               | –          | 541 <sup>a</sup>      | 13                   | 2.4 <sup>a</sup>  | 1.1–3.7   | –                        |
| PermaNet <sup>®</sup> 2.0   | Unwashed   | 490 <sup>ab</sup>     | 113                  | 23.1 <sup>b</sup> | 19.4–26.8 | 18.5                     |
|                             | Washed 20x | 903 <sup>c</sup>      | 128                  | 14.2 <sup>c</sup> | 11.9–16.5 | 21.3                     |
| PermaNet <sup>®</sup> 3.0   | Unwashed   | 591 <sup>bd</sup>     | 331                  | 56.0 <sup>d</sup> | 52.0–60   | 58.8                     |
|                             | Washed 20x | 895 <sup>c</sup>      | 272                  | 30.4 <sup>e</sup> | 27.4–33.4 | 47.9                     |
| Interceptor <sup>®</sup> G2 | Unwashed   | 623 <sup>de</sup>     | 520                  | 83.5 <sup>f</sup> | 80.6–86.4 | 93.7                     |
|                             | Washed 20x | 669 <sup>cd</sup>     | 501                  | 74.9 <sup>e</sup> | 71.6–78.2 | 90.2                     |
| PermaNet <sup>®</sup> Dual  | Unwashed   | 459 <sup>a</sup>      | 351                  | 76.5 <sup>e</sup> | 72.6–80.4 | 62.5                     |
|                             | Washed 20x | 796 <sup>ce</sup>     | 600                  | 75.4 <sup>e</sup> | 72.4–78.4 | 108.5                    |

403 \*Values in the same column bearing the same letter do not differ significantly at the 5% level according to logistic  
 404 regression analysis

### 405 **Non-inferiority assessment**

406 Following provisional WHO guidelines recommending a non-inferiority margin of 0.7 [40],  
 407 PermaNet<sup>®</sup> Dual was considered non-inferior to Interceptor<sup>®</sup> G2 for mortality if the lower 95%  
 408 confidence interval (CI) of the odds ratio describing the difference in mortality was greater than 0.7  
 409 and for blood-feeding if the upper 95% CI estimate of the odds ratio describing the difference in  
 410 blood-feeding was lower than 1.43. PermaNet<sup>®</sup> Dual was also tested for its superiority over  
 411 PermaNet<sup>®</sup> 2.0 and PermaNet<sup>®</sup> 3.0 for mortality and blood-feeding outcomes. For the non-  
 412 inferiority and superiority assessments, results with unwashed and washed nets were pooled to  
 413 generate a single efficacy estimate over the lifetime of the net. As per the recommendations of a  
 414 recent WHO technical consultation [41], mortality was adopted as the primary endpoint to assess  
 415 the non-inferiority of PermaNet<sup>®</sup> Dual while blood-feeding was included as a secondary endpoint to  
 416 support programmatic decision-making.

417 The odds ratio describing the difference between PermaNet<sup>®</sup> Dual and Interceptor<sup>®</sup> G2 was 0.854  
 418 for mortality (76% vs. 79%, 95% CIs: 0.703–1.038) and 1.445 for blood-feeding (35% vs. 26%, 95%  
 419 CIs: 1.203–1.735) (Figures 4 & 5, Table 5). Based on the non-inferiority margin outlined above,  
 420 PermaNet<sup>®</sup> Dual was therefore non-inferior to Interceptor<sup>®</sup> G2 in terms of its ability to kill vector  
 421 mosquitoes but not non-inferior in terms of its ability to prevent blood-feeding. PermaNet<sup>®</sup> Dual  
 422 demonstrated superiority over PermaNet<sup>®</sup> 2.0 both in terms of vector mortality (76% vs. 17%,  
 423  $p < 0.001$ ) and blood-feeding (35% vs. 51%,  $p < 0.001$ ). PermaNet<sup>®</sup> Dual was also superior to  
 424 PermaNet<sup>®</sup> 3.0 in terms of inducing vector mortality (76% vs. 41%,  $p < 0.001$ ) however, it was inferior  
 425 in terms of preventing blood-feeding (35% vs. 23%,  $p < 0.001$ ). Detailed results from the non-  
 426 inferiority and superiority assessments are provided in Table S1.

427

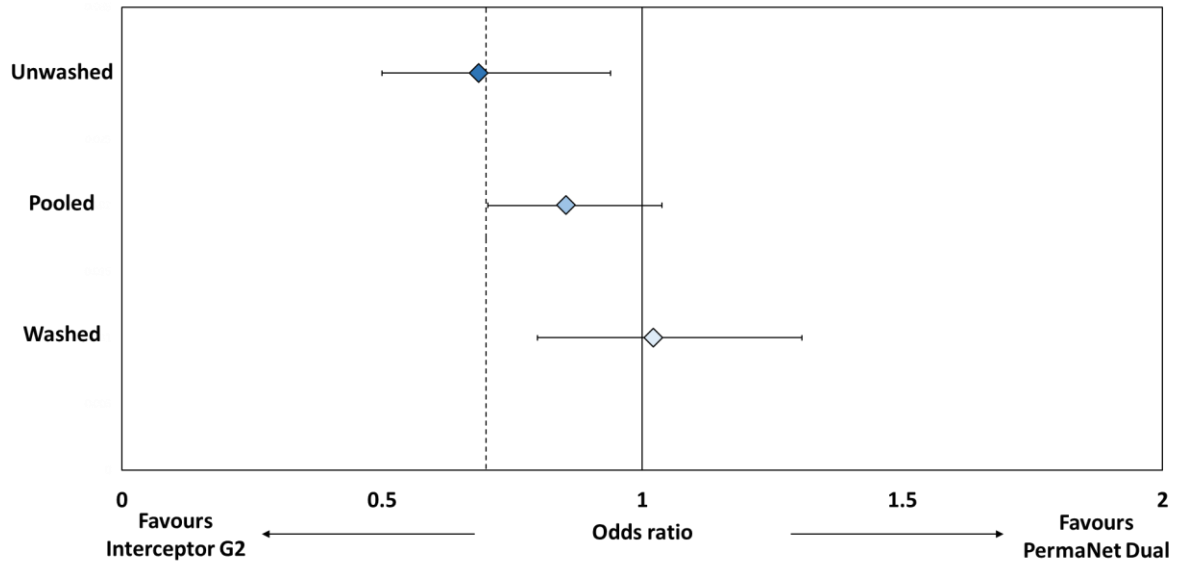

428

429 **Figure 4:** Non-inferiority analysis for proportional mosquito mortality in experimental huts for  
430 PermaNet® Dual compared to Interceptor® G2. Odds ratios represented by blue-shaded diamonds for  
431 unwashed nets, washed nets and pooled analysis. Error bars represent 95% CIs. Dashed line  
432 represents margin of non-inferiority (odds ratio=0.7). Lower 95% CI must exceed dashed line to fulfill  
433 non-inferiorty criteria.

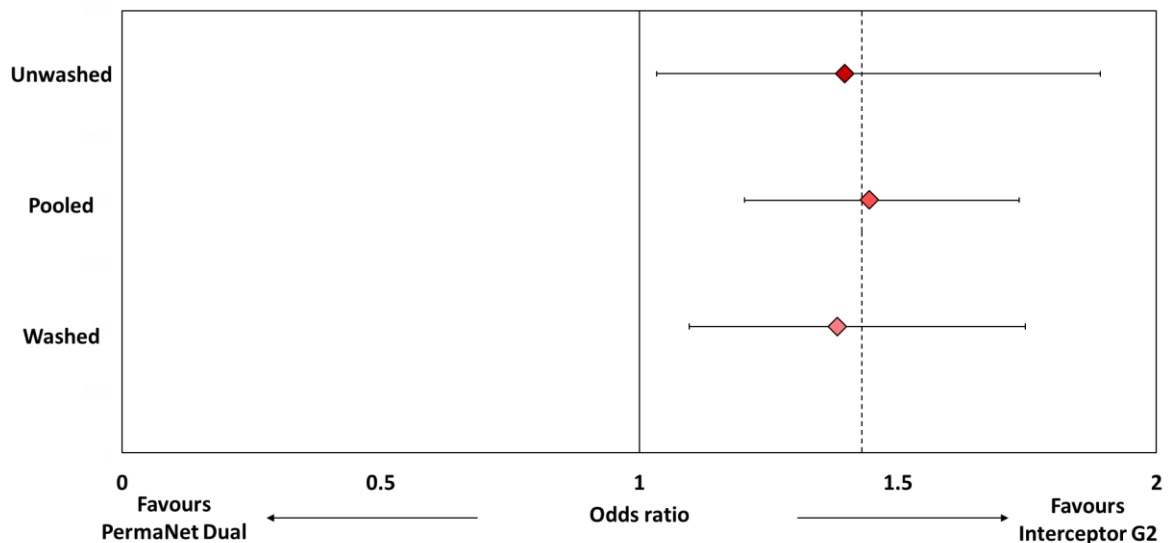

434

435 **Figure 5:** Non-inferiority analysis for proportional mosquito blood-feeding in experimental huts for  
436 PermaNet® Dual compared to Interceptor® G2. Odds ratios represented by red-shaded diamonds for  
437 unwashed nets, washed nets and pooled analysis. Error bars represent 95% CIs. Dashed line  
438 represents margin of non-inferiority (odds ratio=1.43). Upper 95% CI must not exceed dashed line to  
439 fulfill non-inferiorty criteria.

440

441

442

443

444

445 **Table 5:** Non-inferiority analyses comparing the effect of PermaNet® Dual to Interceptor® G2 for  
 446 mosquito mortality and blood-feeding outcomes in experimental huts. *To fulfill non-inferiority*  
 447 *criteria, lower 95% CI of odds ratio must exceed 0.7 for mortality while upper 95% CI of odds ratio*  
 448 *must not exceed 1.43 for blood-feeding.*

|                      | Unwashed               |                  | Washed                 |                  | Pooled                 |                  |
|----------------------|------------------------|------------------|------------------------|------------------|------------------------|------------------|
|                      | Odds ratio (95% CIs)   | Non-inferiority  | Odds ratio (95% CIs)   | Non-inferiority  | Odds ratio (95% CIs)   | Non-inferiority  |
| <b>Mortality</b>     | 0.686<br>(0.500–0.939) | Not non-inferior | 1.022<br>(0.799–1.307) | Non-inferior     | 0.854<br>(0.703–1.038) | Non-inferior     |
| <b>Blood-feeding</b> | 1.398<br>(1.034–1.891) | Not non-inferior | 1.383<br>(1.096–1.746) | Not non-inferior | 1.445<br>(1.203–1.735) | Not non-inferior |

449

#### 450 **Supplementary laboratory bioassay results**

451 Cone bioassay results with the susceptible *An. gambiae s.s.* Kisumu strain are provided in Figure 5  
 452 with more detailed results provided in supplementary information (Table S2). PermaNet® 3.0 roof  
 453 samples induced the highest mortality rates in cone bioassays (78–97%). As expected, the  
 454 performance of the pyrethroid-chlorfenapyr nets was very poor in cone bioassays inducing <60%  
 455 mortality with all ITN pieces tested. Hence, the results further demonstrate the unsuitability of cone  
 456 bioassays for testing pyrethroid-chlorfenapyr ITNs.

457 Tunnel test mortality with the pyrethroid-resistant Covè strain was lowest with PermaNet® 2.0,  
 458 (<70%) though this did not decline significantly after washing (Figure 6). In contrast, unwashed and  
 459 washed net pieces of both pyrethroid-chlorfenapyr ITNs taken before and after the hut trial induced  
 460 ≥98% mortality. Blood-feeding inhibition was high with all ITNs (50–93%). Highest blood-feeding  
 461 inhibition was achieved with PermaNet® Dual, exceeding 85% with all net pieces and was similar  
 462 between unwashed and washed pieces taken before (88% vs. 91%) and after the hut trial (93% vs.  
 463 90%). More detailed results from the tunnel tests are provided in supplementary information (Table  
 464 S3).  
 465

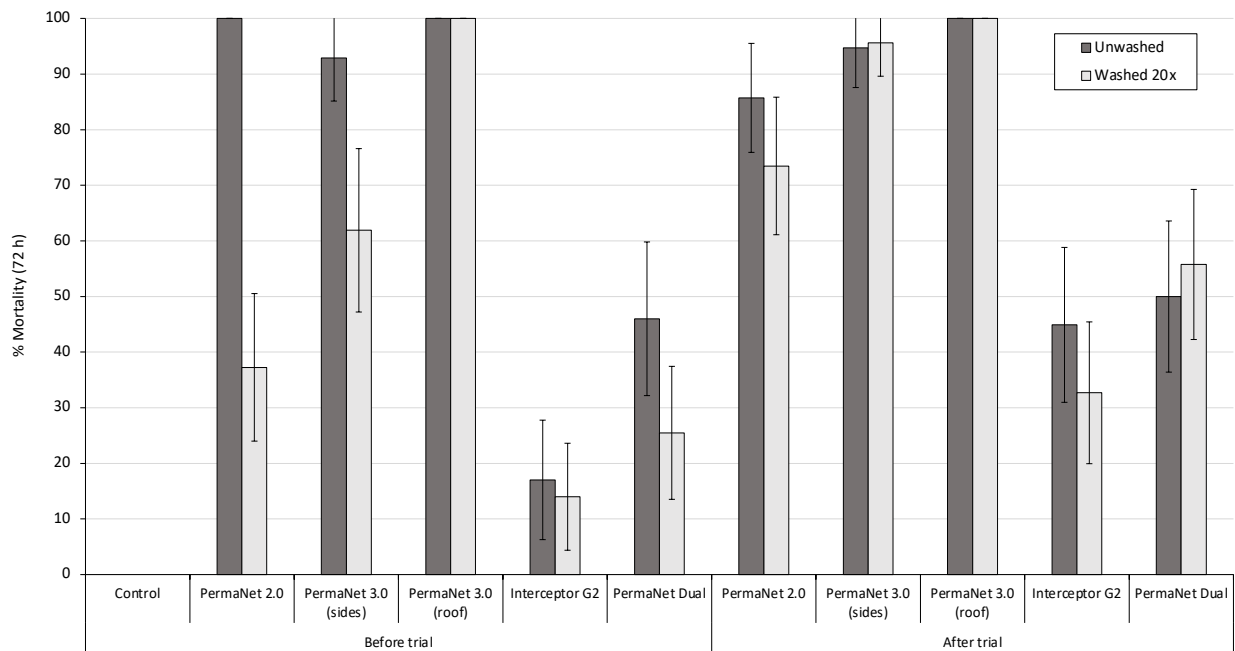

466  
 467 **Figure 6:** Mortality after 72 h of susceptible *Anopheles gambiae sensu stricto* Kisumu strain in  
 468 supplementary cone bioassays. Approximately 10 mosquitoes were exposed to each of the 5 net  
 469 pieces cut from unwashed and washed nets before and after the hut trial for 3 mins in two batches of  
 470 5. Error bars represent 95% CIs.

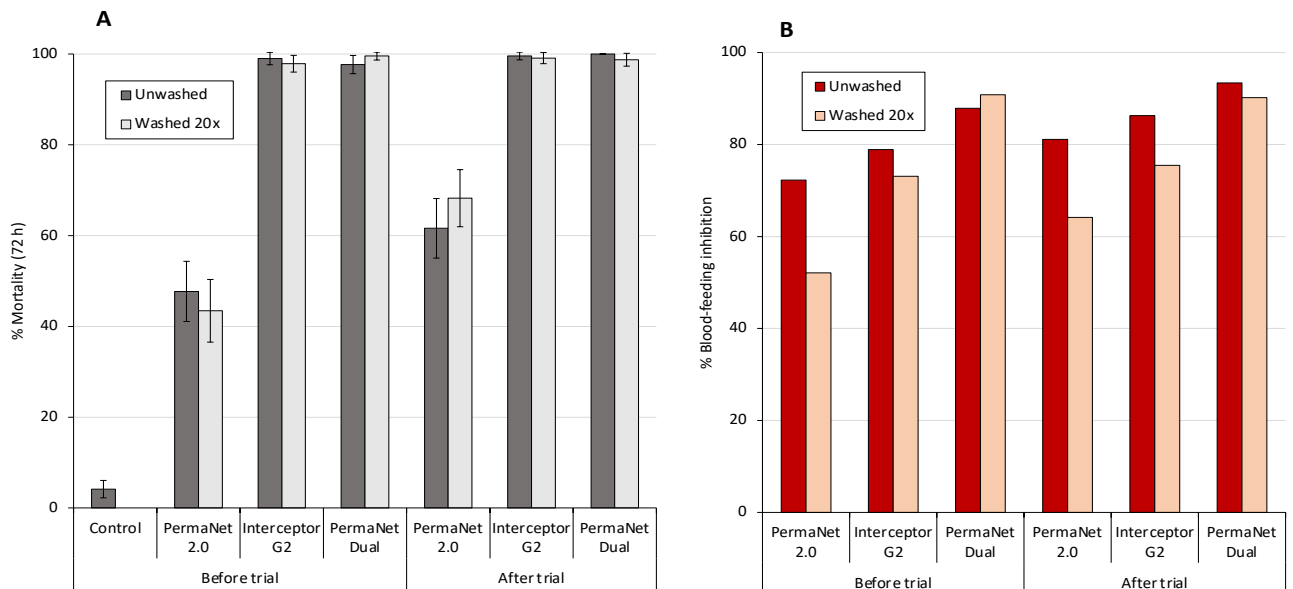

471  
 472 **Figure 7:** Mortality after 72 h (A) and blood-feeding inhibition (B) of pyrethroid-resistant *Anopheles*  
 473 *gambiae sensu lato* Covè strain in supplementary tunnel tests. Approximately 100 mosquitoes were  
 474 exposed to each of the two randomly selected net pieces from each treatment arm overnight in one  
 475 replicate tunnel test. Error bars represent 95% CIs.  
 476

## 477 Chemical analysis of net pieces results

478 The active ingredient content in all unwashed ITNs were within defined specifications declared by  
479 the manufacturers. Retention of deltamethrin after 20 washes was lowest with net pieces cut from  
480 PermaNet® 2.0 (17%) (Table 6). PermaNet® 3.0 showed higher proportional wash-retention of  
481 deltamethrin on the roof panel (86.1%) compared to the side panels (26%). The PBO component  
482 showed moderate levels of wash-retention (60%). Between the pyrethroid-chlorfenapyr ITNs,  
483 Interceptor® G2 showed higher levels of wash-retention of both active ingredients (87% for alpha-  
484 cypermethrin and 65% for chlorfenapyr) compared to PermaNet® Dual (42% for deltamethrin and  
485 25% for chlorfenapyr). The wash-resistance index of chlorfenapyr was thus higher with Interceptor®  
486 G2 (97.9%) than with PermaNet® Dual (93.3%).

487 **Table 6:** Chemical content of unwashed and washed net pieces taken before and after the  
488 experimental hut trial in Covè, Benin.

| ITN type        | Active ingredient(s) | AI content (g/kg) |            | AI retention (%) |
|-----------------|----------------------|-------------------|------------|------------------|
|                 |                      | Unwashed          | Washed 20x |                  |
| PermaNet® 2.0   | Deltamethrin         | 1.3               | 0.2        | 16.8             |
|                 | Deltamethrin (sides) | 2.1               | 0.5        | 25.8             |
| PermaNet® 3.0   | Deltamethrin (roof)  | 4.0               | 3.5        | 86.1             |
|                 | PBO (roof)           | 23.2              | 13.9       | 59.9             |
| Interceptor® G2 | Alpha-cypermethrin   | 2.4               | 2.1        | 86.8             |
|                 | Chlorfenapyr         | 5.5               | 3.6        | 65.2             |
| PermaNet® Dual  | Deltamethrin         | 2.3               | 1.0        | 41.9             |
|                 | Chlorfenapyr         | 5.2               | 1.3        | 25.0             |

489

## 490 Discussion

491 This study evaluated the efficacy and wash resistance of PermaNet® Dual – a new deltamethrin-  
492 chlorfenapyr net – against a pyrethroid-resistant malaria vector population in an experimental hut  
493 trial in southern Benin. PermaNet® Dual was investigated for its superiority to WHO-prequalified  
494 pyrethroid-only (PermaNet® 2.0) and pyrethroid-PBO (PermaNet® 3.0) ITNs and non-inferiority to a  
495 WHO-prequalified pyrethroid-chlorfenapyr ITN (Interceptor® G2) with empirical evidence of public  
496 health value.

497 The poor performance of PermaNet® 2.0 (<25% mortality) is typical of experimental hut trials  
498 conducted with pyrethroid-only nets at the Covè hut site and is attributable to the high intensity of  
499 pyrethroid resistance demonstrated in susceptibility bottle bioassays in this study and in previous  
500 [35, 36]. Complete restoration of susceptibility to deltamethrin following pre-exposure to PBO was  
501 observed in the bottle bioassays which suggests strong involvement of cytochrome P450  
502 monooxygenase activity in deltamethrin resistance in the Covè vector population during the hut  
503 trial. Previous bioassays performed with wild *An. gambiae s.l.* from Covè using different pyrethroid  
504 insecticides have usually resulted in partial or no restoration of susceptibility to pyrethroids with  
505 pre-exposure to PBO [42]. This variability in outcome of synergist bioassays may be due to  
506 differences in the type of pyrethroid insecticide tested, test methods or seasonal changes in the  
507 vector population. However, despite complete restoration of pyrethroid susceptibility following PBO



508 pre-exposure in bottle bioassays in this hut trial, the levels of improved mosquito mortality achieved  
509 with the PermaNet® 3.0 relative to PermaNet® 2.0 were moderate (17% vs. 40%) and did not differ  
510 substantially compared to what has been reported in previous hut studies with this vector  
511 population [20, 43]. This finding would suggest the presence of more complex behavioural  
512 mechanisms that may have reduced mosquito contact with PermaNet® 3.0 compromising its efficacy  
513 in the experimental huts. Further studies to investigate the relationship between levels of  
514 restoration of susceptibility to pyrethroids achieved in PBO pre-exposure bioassays and the efficacy  
515 of pyrethroid-PBO ITNs would be useful.

516 Both pyrethroid-chlorfenapyr ITNs (PermaNet® Dual and Interceptor® G2) induced significantly  
517 higher levels of mortality (75%-86%) of wild pyrethroid-resistant malaria vector mosquitoes entering  
518 the experimental huts relative to the pyrethroid-only and pyrethroid-PBO ITNs. This is mostly due to  
519 susceptibility of the Covè vector population to chlorfenapyr as demonstrated in bottle bioassays.  
520 This superior performance of pyrethroid-chlorfenapyr ITNs confirms previous findings in  
521 experimental hut studies in Benin [22, 44] and across Africa [23-25] and recent cRCTs in Benin [27]  
522 Tanzania [28], reiterating the importance of this innovative ITN technology for improving the control  
523 of pyrethroid-resistant malaria vector populations. PermaNet® Dual was also non-inferior to  
524 Interceptor® G2 for the primary endpoint of mortality thus providing necessary evidence for the  
525 candidate ITN to be covered by WHO policy recommendations for deployment of pyrethroid-  
526 chlorfenapyr nets, pending their availability. Studies investigating its entomological performance  
527 against other malaria vector species in other ecological settings are ongoing and will add to the body  
528 of evidence to support its deployment. Prequalification of PermaNet® Dual by WHO will provide  
529 additional choice of pyrethroid-chlorfenapyr nets to vector control programmes and help procurers  
530 meet increasing global demand for this effective dual-active ITN class by endemic countries.

531 Experimental hut performance after 20 washes is used as a proxy for ITN efficacy after 3 years of  
532 field use [37]. Although wash-retention of chlorfenapyr was lower in PermaNet® Dual relative to  
533 Interceptor® G2, its performance in experimental huts remained unchanged after 20 standardised  
534 washes, showing potential for the net to demonstrate durable bioefficacy. This finding was  
535 supported by the tunnel tests demonstrating high mortality of pyrethroid-resistant Covè mosquitoes  
536 (>95%) with the two pyrethroid-chlorfenapyr ITNs, both before and after 20 washes. However,  
537 further studies to monitor the post-market performance of PermaNet® Dual including assessment of  
538 its fabric integrity, bioefficacy and chemical content under household use over 3 years, are  
539 advisable.

540 While a superior performance of pyrethroid-chlorfenapyr nets relative to pyrethroid-only and  
541 pyrethroid-PBO nets was clearly demonstrated in this study and in previous hut studies and cRCTs,  
542 care should be taken not to over-rely on this one class of insecticide as this may quickly drive  
543 development of resistance to chlorfenapyr eventually leading to product failure. Pyrethroid-  
544 chlorfenapyr nets should be ideally deployed alongside other insecticide chemistries or in rotation  
545 with other ITN types as part of an insecticide resistance management strategy aimed at preventing  
546 the selection of chlorfenapyr resistance and extending the useful life of this ITN class.

547

548

## 549 **Conclusions**

550 PermaNet® Dual, a new deltamethrin-chlorfenapyr ITN developed by Vestergaard Sàrl,  
551 demonstrated superior performance compared to a pyrethroid-only ITN (PermaNet® 2.0) and a  
552 pyrethroid-PBO (PermaNet® 3.0) ITN in experimental huts against wild, free-flying pyrethroid-  
553 resistant *An gambiae s.l.* in Benin. PermaNet® Dual was also non-inferior to Interceptor® G2, a WHO-  
554 prequalified pyrethroid-chlorfenapyr ITN that has demonstrated evidence of improved public health  
555 impact in cluster randomised-controlled trials. The addition of PermaNet® Dual to the current WHO  
556 list of prequalified ITNs presents an additional option of this highly effective ITN class for improved  
557 control of malaria transmitted by pyrethroid-resistant mosquito vectors.

## 558 **List of abbreviations**

559 PBO: Piperonyl butoxide  
560 ITN: Insecticide treated nets  
561 LLIN: Long-lasting insecticidal nets  
562 WHO: World Health Organization  
563 PQ: Prequalification team  
564 cRCT: Cluster randomised controlled trial  
565 GLP: Good laboratory practice  
566 CREC: Centre de Recherche Entomologique de Cotonou  
567 LSHTM: London School of Hygiene & Tropical Medicine

## 568 **Availability of data and material**

570 The datasets used and/or analysed during the current study are available from the corresponding  
571 author on reasonable request.

## 572 **Competing interests**

573 The authors declare that they have no competing interests.

## 574 **Funding**

575 This project was an independent study funded by a research grant from Vestergaard Sàrl to Corine  
576 Ngufor. Funding covered research costs and operational expenses. The funders had no role in study  
577 design, data collection and analysis, decision to publish, or preparation of the manuscript.

## 578 **Authors' contributions**

579 CN designed the study, acquired funding, supervised the project and prepared the final manuscript.  
580 TS supervised the hut trial, analysed the data, prepared the graphs and contributed to manuscript  
581 preparation. BN and MG performed the hut trial and laboratory bioassays. DT performed the  
582 susceptibility bioassays. VA ensured compliance to principles of principles of Good Laboratory  
583 Practice. OP and PDV performed the chemical analysis. All authors read and approved the final  
584 version of the manuscript.

## 585 **Acknowledgements**

586 We thank Dr. Eleanore Sternberg (previously Vestergaard Sàrl) and Melinda Hadi of Vestergaard Sàrl  
587 for providing the PermaNet® nets. We also thank the staff of CREC/LSHTM (Renaud Govoetachan,

588 Josias Fagbohoun, Estelle Vigninou, Abel Agbevo etc.) for their assistance and Ms. Imelda Glele and  
589 Danielle Apithy for administrative and logistics support. Special thanks to the rice farmers at Covè for  
590 their participation in the hut study.

## 591 References

- 592 1. Pryce, J., M. Richardson, and C. Lengeler, *Insecticide-treated nets for preventing malaria*.  
593 Cochrane Database of Systematic Reviews, 2018(11).
- 594 2. Lim, S.S., et al., *Net benefits: a multicountry analysis of observational data examining*  
595 *associations between insecticide-treated mosquito nets and health outcomes*. PLoS  
596 medicine, 2011. **8**(9): p. e1001091.
- 597 3. Bhatt, S., et al., *The effect of malaria control on Plasmodium falciparum in Africa between*  
598 *2000 and 2015*. Nature, 2015. **526**(7572): p. 207-211.
- 599 4. World Health Organisation, *World malaria report 2021*. 2021, World Health Organisation.
- 600 5. Kleinschmidt, I., et al., *Implications of insecticide resistance for malaria vector control with*  
601 *long-lasting insecticidal nets: a WHO-coordinated, prospective, international, observational*  
602 *cohort study*. The Lancet infectious diseases, 2018. **18**(6): p. 640-649.
- 603 6. Strode, C., et al., *The impact of pyrethroid resistance on the efficacy of insecticide-treated*  
604 *bed nets against African anopheline mosquitoes: systematic review and meta-analysis*. PLoS  
605 Med, 2014. **11**(3): p. e1001619.
- 606 7. Toé, K.H., et al., *Increased pyrethroid resistance in malaria vectors and decreased bed net*  
607 *effectiveness, Burkina Faso*. Emerging infectious diseases, 2014. **20**(10): p. 1691.
- 608 8. Asidi, A., et al., *Loss of household protection from use of insecticide-treated nets against*  
609 *pyrethroid-resistant mosquitoes, Benin*. Emerging infectious diseases, 2012. **18**(7): p. 1101.
- 610 9. N'Guessan, R., et al., *Reduced efficacy of insecticide-treated nets and indoor residual*  
611 *spraying for malaria control in pyrethroid resistance area, Benin*. Emerging infectious  
612 diseases, 2007. **13**(2): p. 199.
- 613 10. Bingham, G., et al., *Can piperonyl butoxide enhance the efficacy of pyrethroids against*  
614 *pyrethroid-resistant Aedes aegypti?* Tropical Medicine & International Health, 2011. **16**(4): p.  
615 492-500.
- 616 11. Oumbouke, W.A., et al., *Evaluation of an alpha-cypermethrin+ PBO mixture long-lasting*  
617 *insecticidal net VEERALIN® LN against pyrethroid resistant Anopheles gambiae ss: an*  
618 *experimental hut trial in M'bé, central Côte d'Ivoire*. Parasites & vectors, 2019. **12**(1): p. 1-10.
- 619 12. Akoton, R., et al., *Experimental huts trial of the efficacy of pyrethroids/piperonyl butoxide*  
620 *(PBO) net treatments for controlling multi-resistant populations of Anopheles funestus ss in*  
621 *Kpomè, Southern Benin*. Wellcome Open Research, 2018. **3**.
- 622 13. Toe, K., et al., *Do bednets including piperonyl butoxide offer additional protection against*  
623 *populations of Anopheles gambiae sl. that are highly resistant to pyrethroids? An*  
624 *experimental hut evaluation in Burkina Faso*. Medical and veterinary entomology, 2018.  
625 **32**(4): p. 407-416.
- 626 14. N'Guessan, R., et al., *An experimental hut evaluation of PermaNet® 3.0, a deltamethrin—*  
627 *piperonyl butoxide combination net, against pyrethroid-resistant Anopheles gambiae and*  
628 *Culex quinquefasciatus mosquitoes in southern Benin*. Transactions of the Royal Society of  
629 Tropical Medicine and Hygiene, 2010. **104**(12): p. 758-765.
- 630 15. Tungu, P., et al., *Evaluation of PermaNet 3.0 a deltamethrin-PBO combination net against*  
631 *Anopheles gambiae and pyrethroid resistant Culex quinquefasciatus mosquitoes: an*  
632 *experimental hut trial in Tanzania*. Malaria Journal, 2010. **9**(1): p. 1-13.
- 633 16. Protopopoff, N., et al., *Effectiveness of a long-lasting piperonyl butoxide-treated insecticidal*  
634 *net and indoor residual spray interventions, separately and together, against malaria*  
635 *transmitted by pyrethroid-resistant mosquitoes: a cluster, randomised controlled, two-by-*  
636 *two factorial design trial*. Lancet, 2018. **391**(10130): p. 1577-1588.

- 637 17. Staedke, S.G., et al., *Effect of long-lasting insecticidal nets with and without piperonyl*  
638 *butoxide on malaria indicators in Uganda (LLINEUP): a pragmatic, cluster-randomised trial*  
639 *embedded in a national LLIN distribution campaign*. *Lancet*, 2020. **395**(10232): p. 1292-1303.
- 640 18. World Health Organisation, *Guidelines for malaria*. 2022, World Health Organisation.
- 641 19. Mehan, F., et al., *LLIN Evaluation in Uganda Project (LLINEUP)–The durability of long-lasting*  
642 *insecticidal nets treated with and without piperonyl butoxide (PBO) in Uganda*. *bioRxiv*, 2022.
- 643 20. Syme, T., et al., *Pyrethroid-piperonyl butoxide (PBO) nets reduce the efficacy of indoor*  
644 *residual spraying with pirimiphos-methyl against pyrethroid-resistant malaria vectors*. *Sci*  
645 *Rep*, 2022. **12**(1): p. 6857.
- 646 21. World Health Organisation, *List of WHO prequalified vector control products*. 2023, World  
647 Health Organisation
- 648 22. N’Guessan, R., et al., *A chlorfenapyr mixture net interceptor® G2 shows high efficacy and*  
649 *wash durability against resistant mosquitoes in West Africa*. *PLoS One*, 2016. **11**(11): p.  
650 e0165925.
- 651 23. Bayili, K., et al., *Evaluation of efficacy of Interceptor® G2, a long-lasting insecticide net coated*  
652 *with a mixture of chlorfenapyr and alpha-cypermethrin, against pyrethroid resistant*  
653 *Anopheles gambiae sl in Burkina Faso*. *Malaria journal*, 2017. **16**(1): p. 1-9.
- 654 24. Camara, S., et al., *Efficacy of Interceptor® G2, a new long-lasting insecticidal net against wild*  
655 *pyrethroid-resistant Anopheles gambiae ss from Côte d’Ivoire: a semi-field trial*. *Parasite*,  
656 **2018**. **25**.
- 657 25. Tungu, P.K., et al., *Efficacy of interceptor® G2, a long-lasting insecticide mixture net treated*  
658 *with chlorfenapyr and alpha-cypermethrin against Anopheles funestus: experimental hut*  
659 *trials in north-eastern Tanzania*. *Malaria Journal*, 2021. **20**(1): p. 1-15.
- 660 26. Oxborough, R.M., et al., *ITN mixtures of chlorfenapyr (pyrrole) and alphacypermethrin*  
661 *(pyrethroid) for control of pyrethroid resistant Anopheles arabiensis and Culex*  
662 *quinquefasciatus*. *PLoS One*, 2013. **8**(2): p. e55781.
- 663 27. Accrombessi, M., et al., *Efficacy of pyriproxyfen-pyrethroid long-lasting insecticidal nets*  
664 *(LLINs) and chlorfenapyr-pyrethroid LLINs compared with pyrethroid-only LLINs for malaria*  
665 *control in Benin: a cluster-randomised, superiority trial*. *The Lancet*, 2023.
- 666 28. Mosha, J.F., et al., *Effectiveness and cost-effectiveness against malaria of three types of dual-*  
667 *active-ingredient long-lasting insecticidal nets (LLINs) compared with pyrethroid-only LLINs in*  
668 *Tanzania: a four-arm, cluster-randomised trial*. *The Lancet*, 2022. **399**(10331): p. 1227-1241.
- 669 29. Accrombessi, M., et al., *Assessing the efficacy of two dual-active ingredients long-lasting*  
670 *insecticidal nets for the control of malaria transmitted by pyrethroid-resistant vectors in*  
671 *Benin: study protocol for a three-arm, single-blinded, parallel, cluster-randomized controlled*  
672 *trial*. *BMC Infect Dis*, 2021. **21**(1): p. 194.
- 673 30. AMP, *Alliance for malaria prevention; mass campaign tracker*.  
674 [https://allianceformalariaprevention.com/mass-campaign-](https://allianceformalariaprevention.com/mass-campaign-tracker/?sfm_mc_date_of_import=20221015)  
675 [tracker/?sfm\\_mc\\_date\\_of\\_import=20221015](https://allianceformalariaprevention.com/mass-campaign-tracker/?sfm_mc_date_of_import=20221015), 2022. **Accessed 28th October 2022**.
- 676 31. UNICEF, *Long-lasting insecticidal nets market update*.  
677 [https://www.unicef.org/supply/media/13951/file/LLIN-Market-and-Supply-Update-October-](https://www.unicef.org/supply/media/13951/file/LLIN-Market-and-Supply-Update-October-2022.pdf)  
678 [2022.pdf](https://www.unicef.org/supply/media/13951/file/LLIN-Market-and-Supply-Update-October-2022.pdf), 2020. **accessed 27th October 2022**.
- 679 32. WHO, *Data requirements and protocol for determining non-inferiority of insecticide-treated*  
680 *net and indoor residual spraying products within an established WHO intervention class*.  
681 Geneva, Switzerland, 2018.  
682 [https://apps.who.int/iris/bitstream/handle/10665/276039/WHO-CDS-GMP-2018.22-](https://apps.who.int/iris/bitstream/handle/10665/276039/WHO-CDS-GMP-2018.22-eng.pdf?ua=1)  
683 [eng.pdf?ua=1](https://apps.who.int/iris/bitstream/handle/10665/276039/WHO-CDS-GMP-2018.22-eng.pdf?ua=1).
- 684 33. WHO, *Norms, standards and processes underpinning development of WHO*  
685 *recommendations on vector control 22 December 2020*.  
686 <https://www.who.int/publications/i/item/9789240017382>, 2020.

- 687 34. WHO, *Standard operating procedure for testing insecticide susceptibility of adult mosquitoes*  
688 *in WHO bottle bioassays*, WHO Bottle-bioassay/01/14 January 2022. World Health  
689 Organisation, Geneva, 2022. [https://apps.who.int/iris/handle/10665/352312?search-](https://apps.who.int/iris/handle/10665/352312?search-result=true&query=WHO+bottle+bioassay&scope=&rpp=10&sort_by=score&order=desc)  
690 [result=true&query=WHO+bottle+bioassay&scope=&rpp=10&sort](https://apps.who.int/iris/handle/10665/352312?search-result=true&query=WHO+bottle+bioassay&scope=&rpp=10&sort_by=score&order=desc) [by=score&order=desc](https://apps.who.int/iris/handle/10665/352312?search-result=true&query=WHO+bottle+bioassay&scope=&rpp=10&sort_by=score&order=desc).  
691 35. Syme, T., et al., *Which indoor residual spraying insecticide best complements standard*  
692 *pyrethroid long-lasting insecticidal nets for improved control of pyrethroid resistant malaria*  
693 *vectors?* PloS one, 2021. **16**(1): p. e0245804.  
694 36. Ngufor, C., et al., *Insecticide resistance profile of Anopheles gambiae from a phase II field*  
695 *station in Cote d'Ivoire, southern Benin: implications for the evaluation of novel vector control*  
696 *products*. Malar J, 2015. **14**: p. 464.  
697 37. World Health Organisation, *Guidelines for laboratory and field-testing of long-lasting*  
698 *insecticidal nets*. 2013, World Health Organisation.  
699 38. World Health Organisation, *WHO Specifications and Evaluations for Public Health Pesticides*  
700 *Deltamethrin + Piperonyl Butoxide Long-Lasting (Incorporated Into Filaments) Insecticidal*  
701 *Net*. 2012, World Health Organisation.  
702 39. Oxborough, R.M., et al., *The activity of the pyrrole insecticide chlorfenapyr in mosquito*  
703 *bioassay: towards a more rational testing and screening of non-neurotoxic insecticides for*  
704 *malaria vector control*. Malaria journal, 2015. **14**(1): p. 1-11.  
705 40. World Health Organisation, *Data requirements and protocol for determining non-inferiority*  
706 *of insecticide-treated net and indoor residual spraying products within an established WHO*  
707 *intervention class*. 2018, World Health Organisation.  
708 41. World Health Organisation, *Technical consultation on determining non-inferiority of vector*  
709 *control products within an established class*. 2021, World Health Organisation.  
710 42. Mosha, J.F., et al., *Effectiveness and cost-effectiveness against malaria of three types of dual-*  
711 *active-ingredient long-lasting insecticidal nets (LLINs) compared with pyrethroid-only LLINs in*  
712 *Tanzania: a four-arm, cluster-randomised trial*. Lancet, 2022. **399**(10331): p. 1227-1241.  
713 43. Ngufor, C., et al., *Comparative efficacy of two pyrethroid-piperonyl butoxide nets (Olyset Plus*  
714 *and PermaNet 3.0) against pyrethroid resistant malaria vectors: a non-inferiority*  
715 *assessment*. Malar J, 2022. **21**(1): p. 20.  
716 44. Ngufor, C., et al., *Which intervention is better for malaria vector control: insecticide mixture*  
717 *long-lasting insecticidal nets or standard pyrethroid nets combined with indoor residual*  
718 *spraying?* Malar J, 2017. **16**(1): p. 340.

719

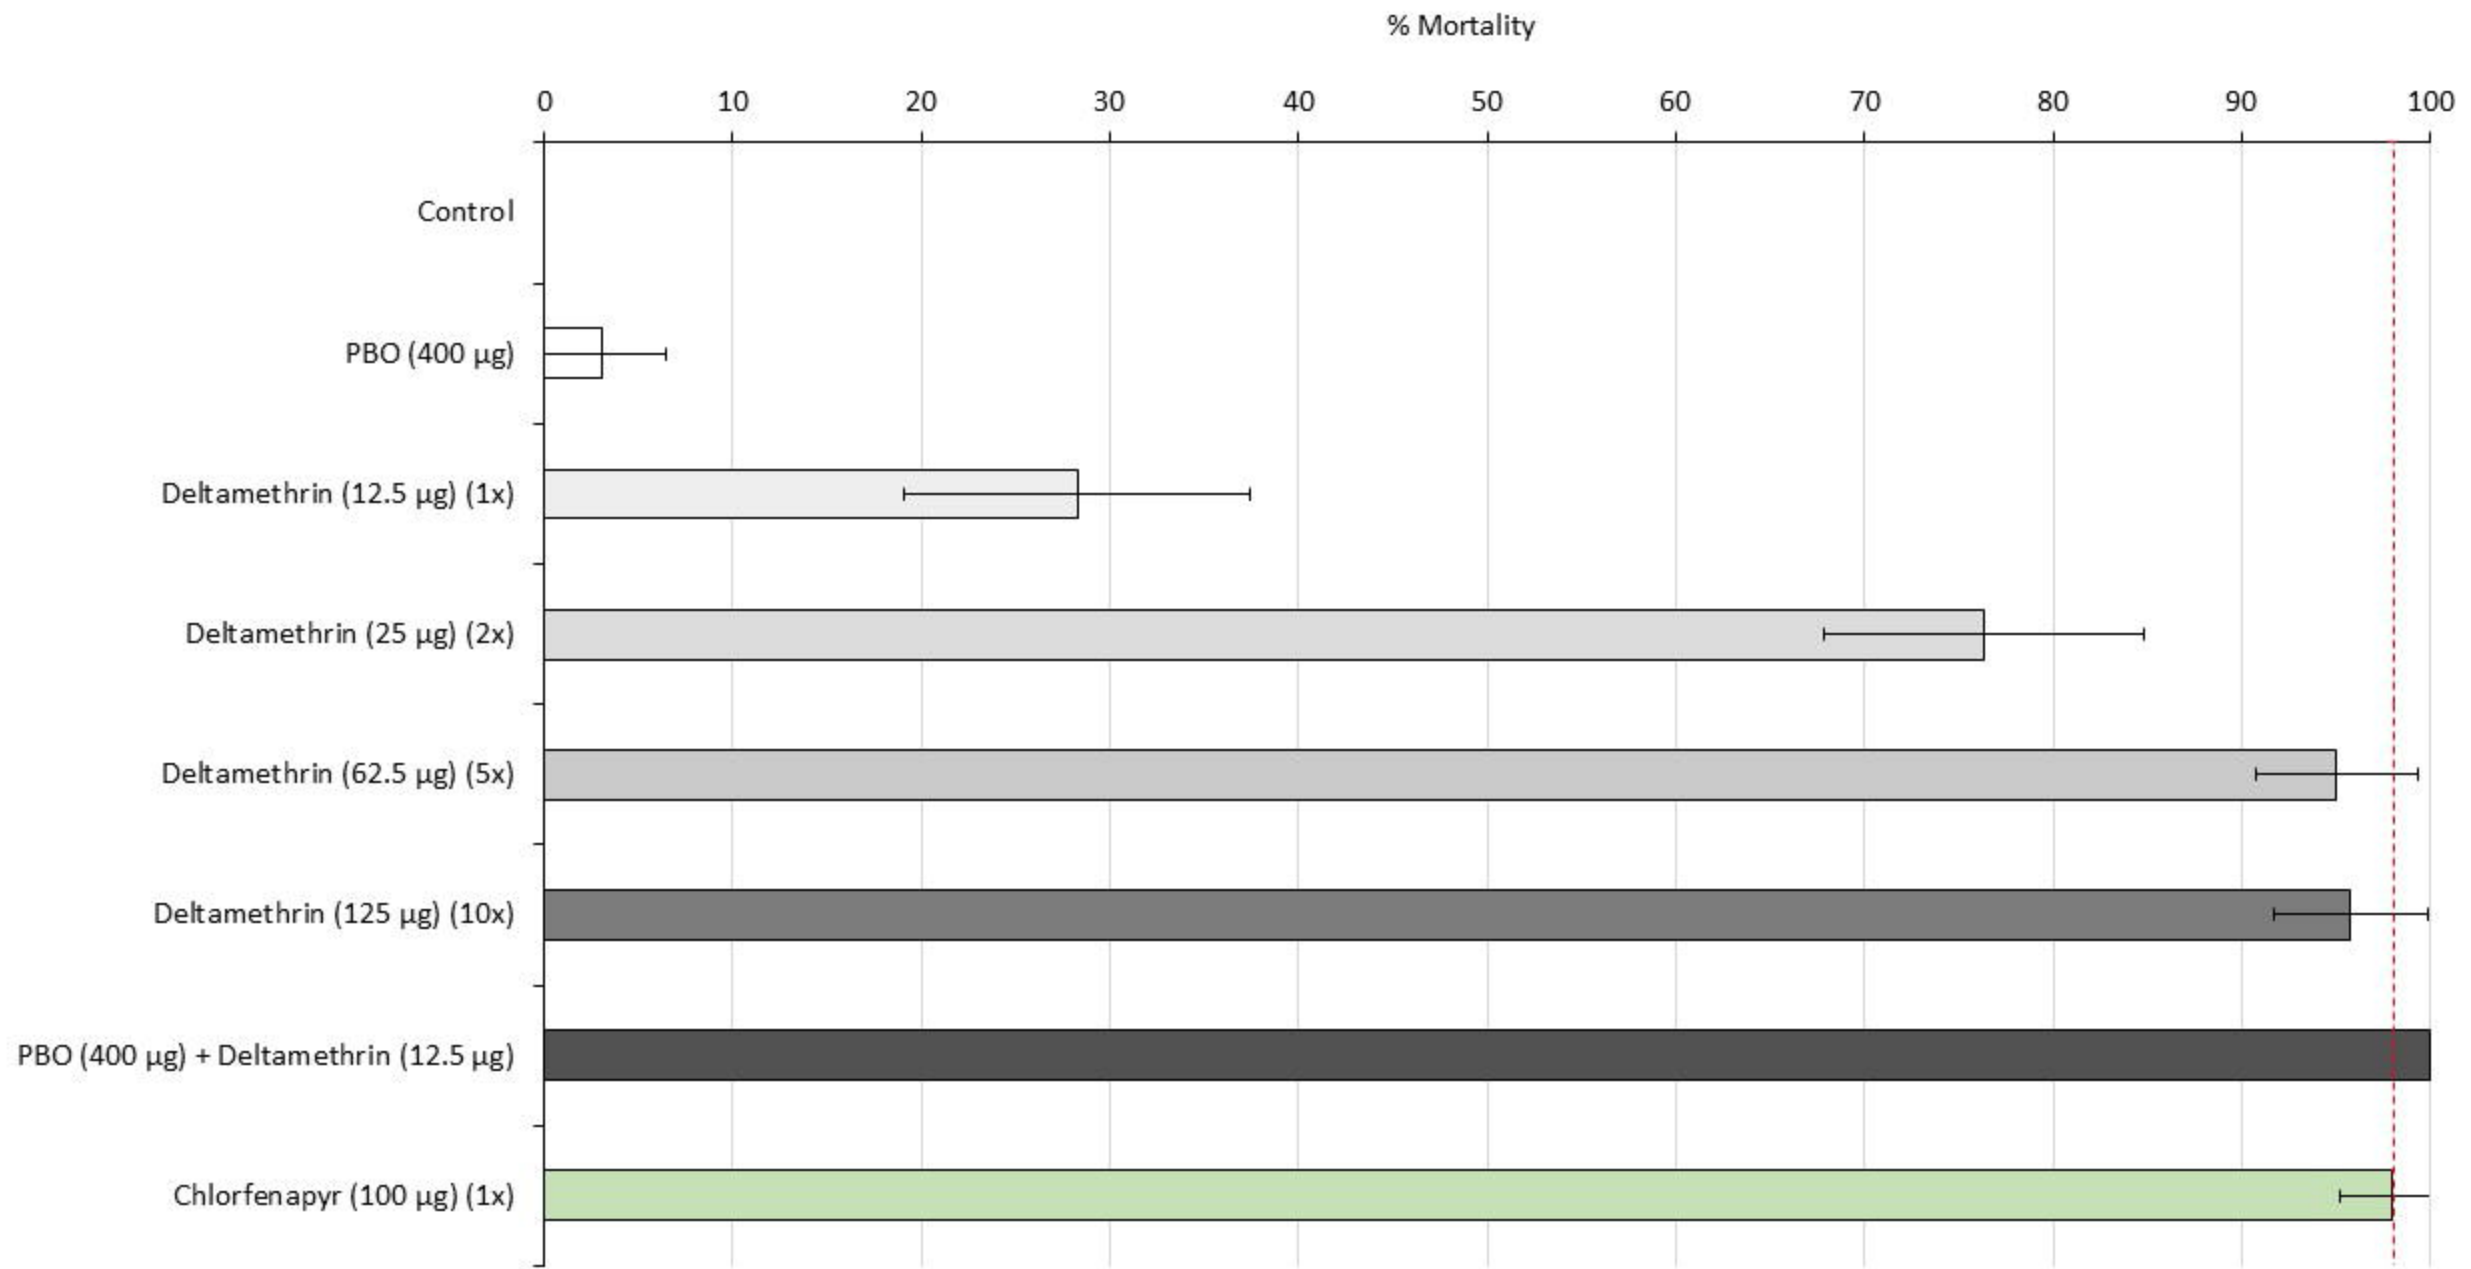

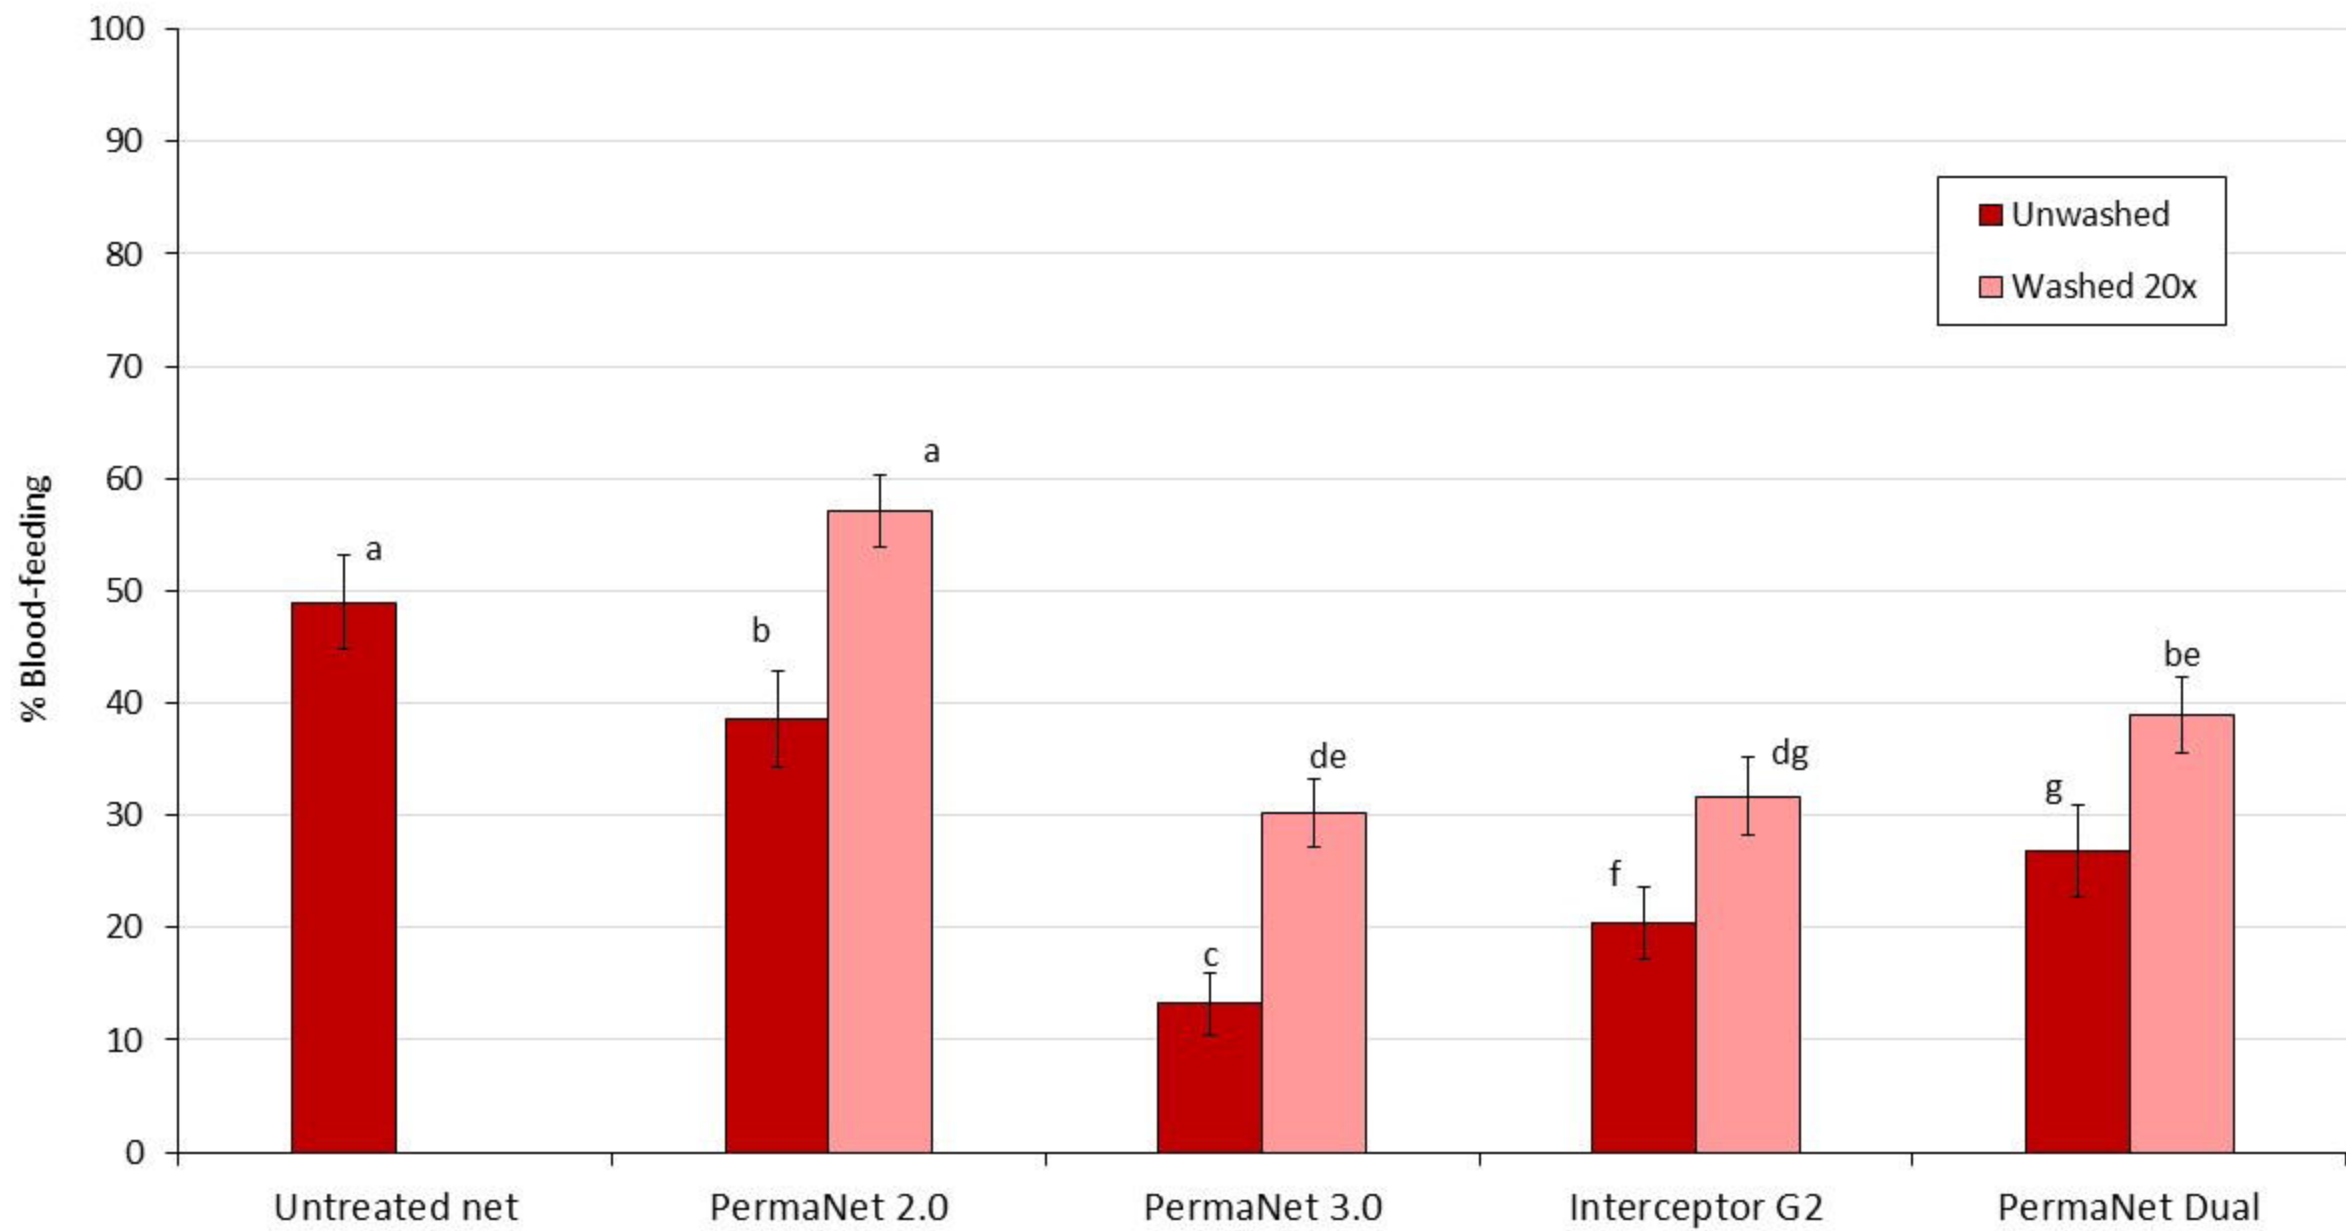

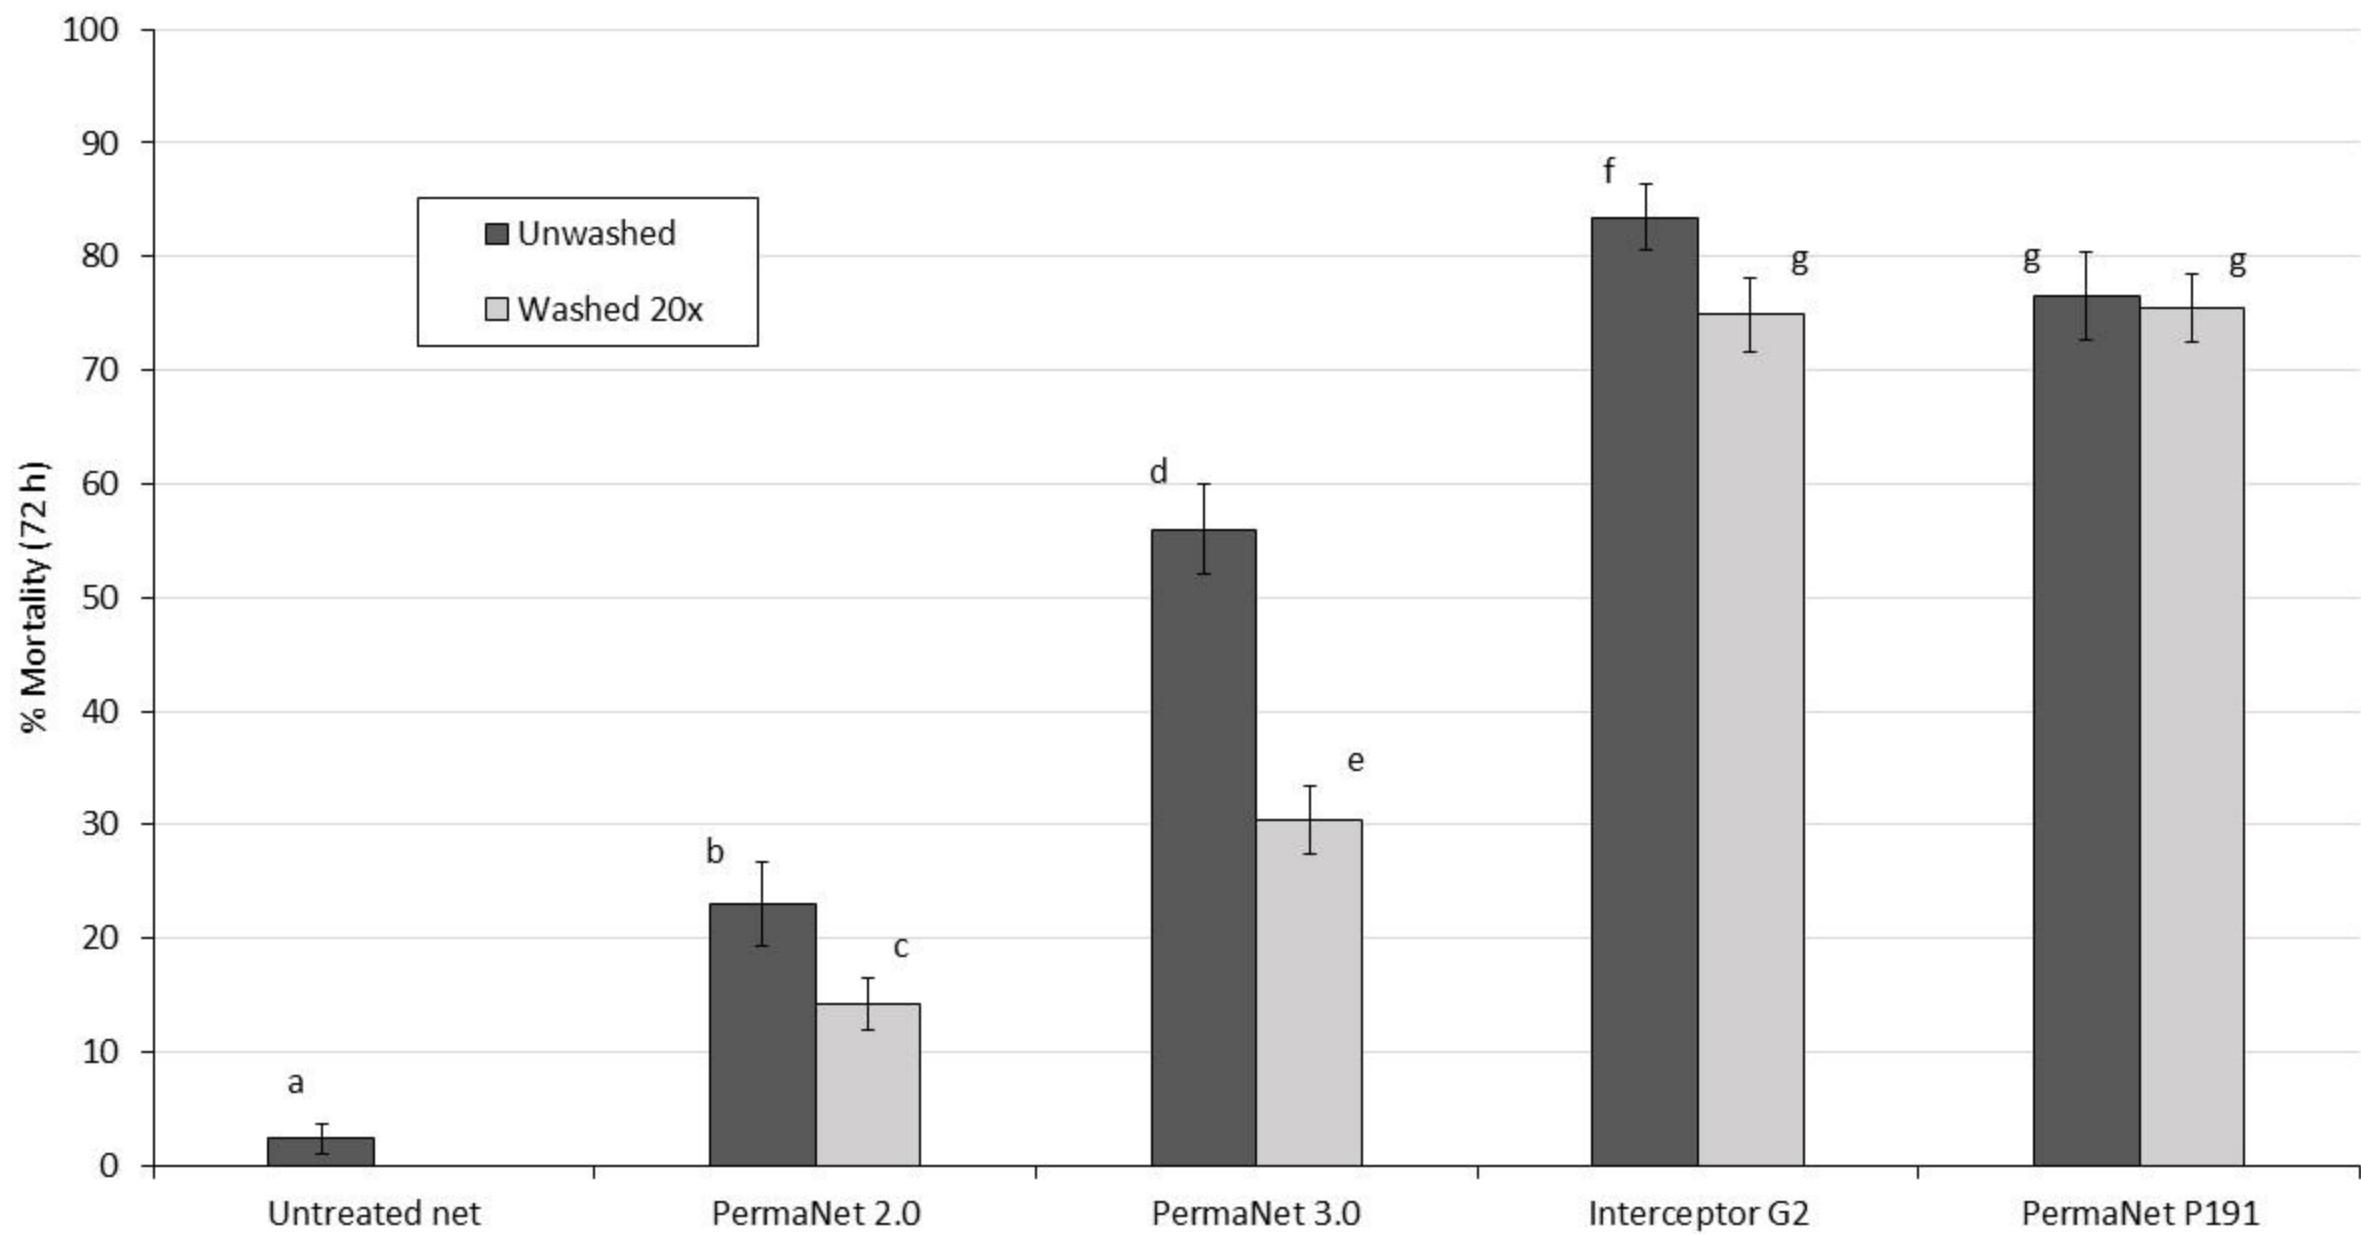



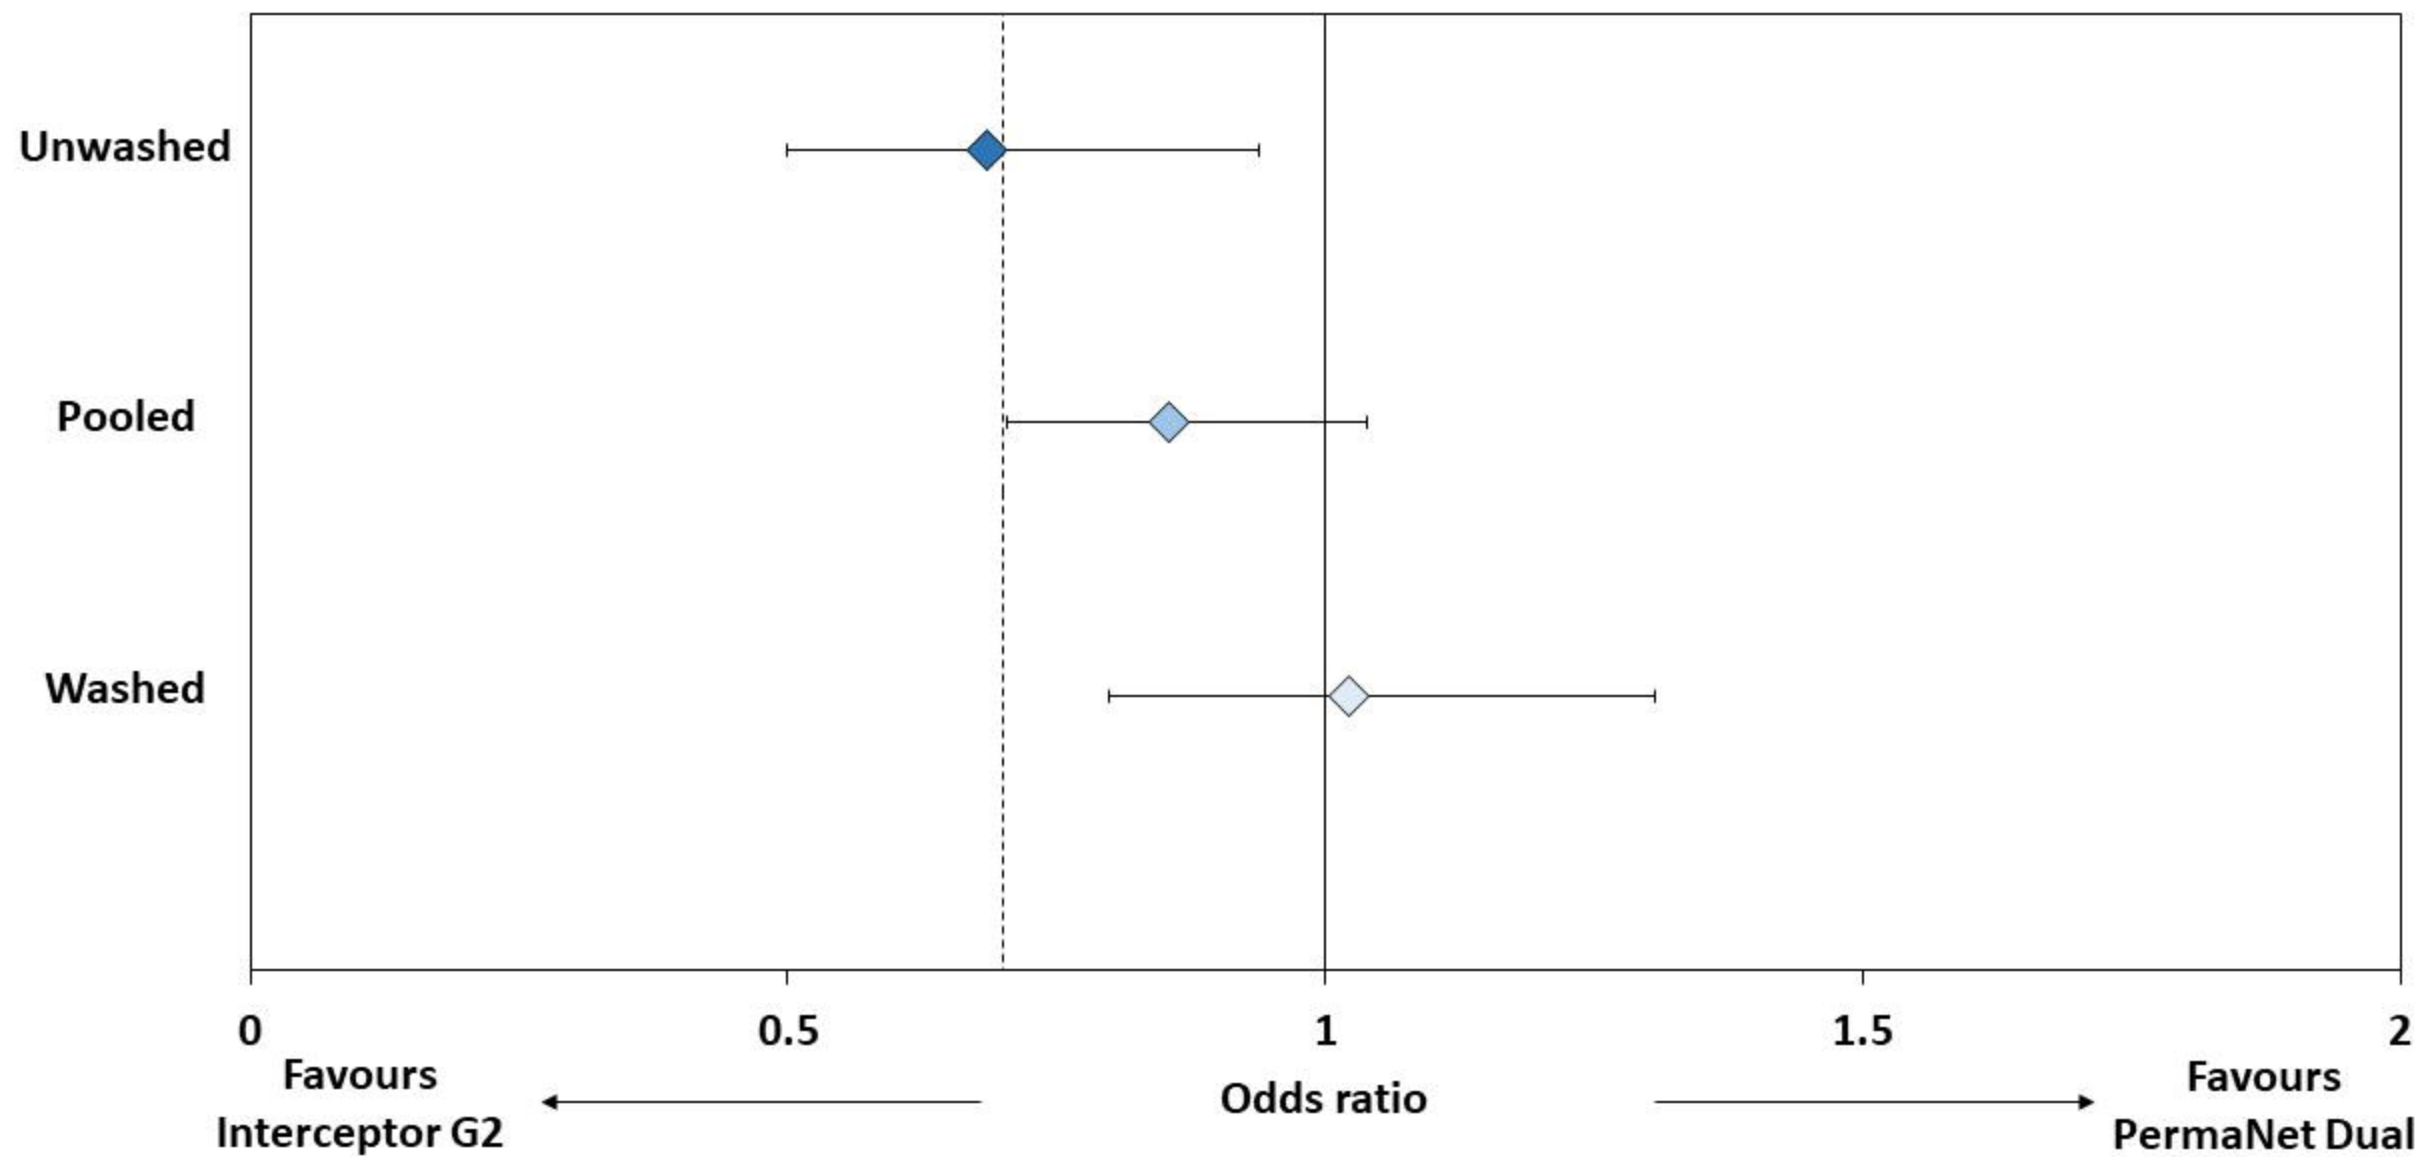

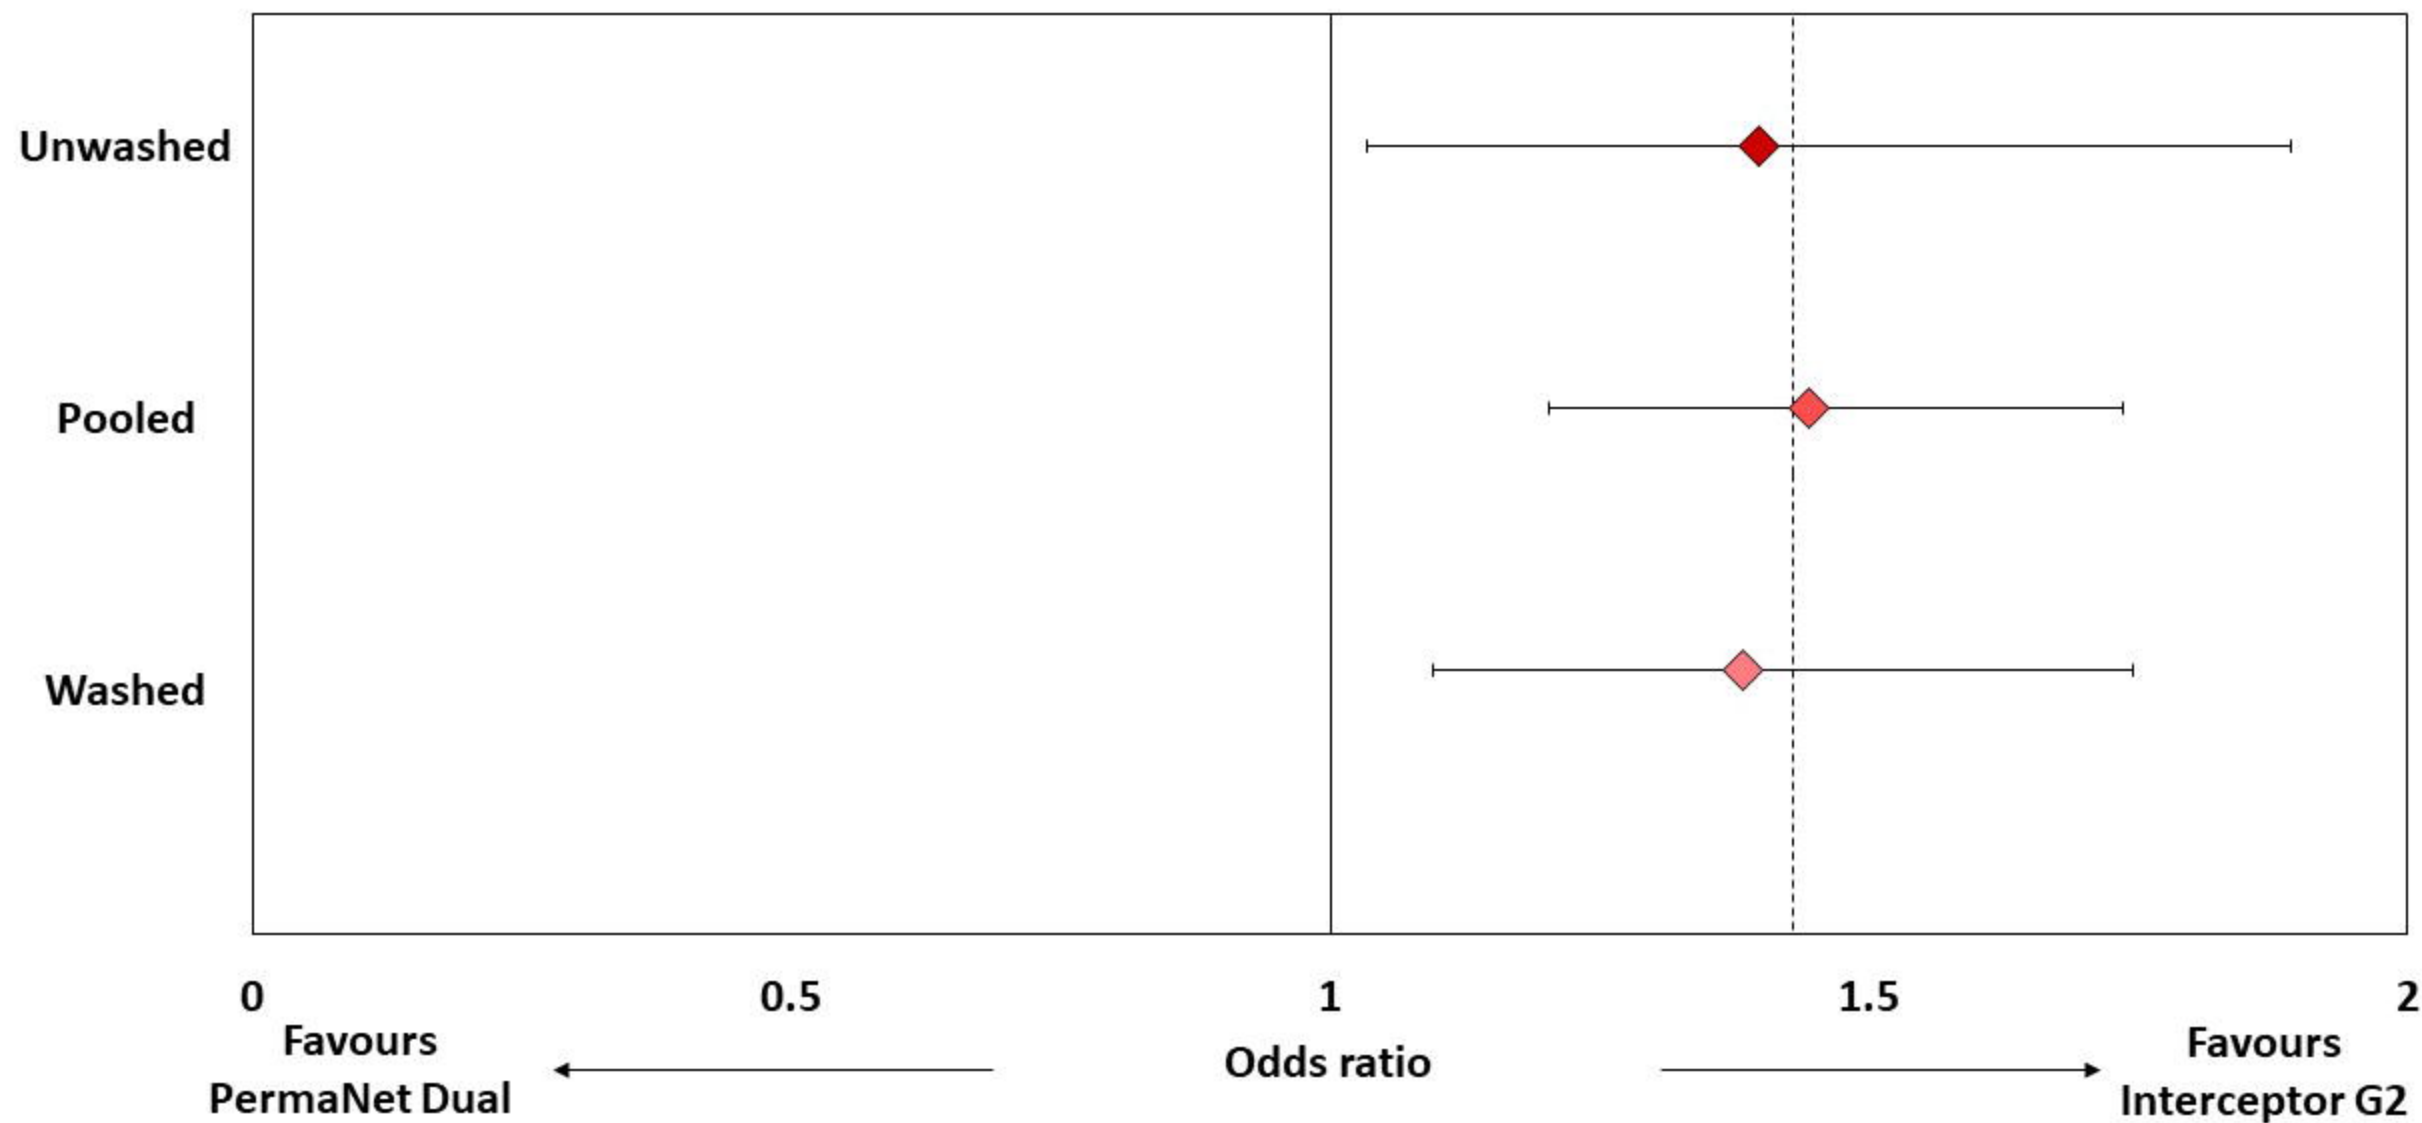

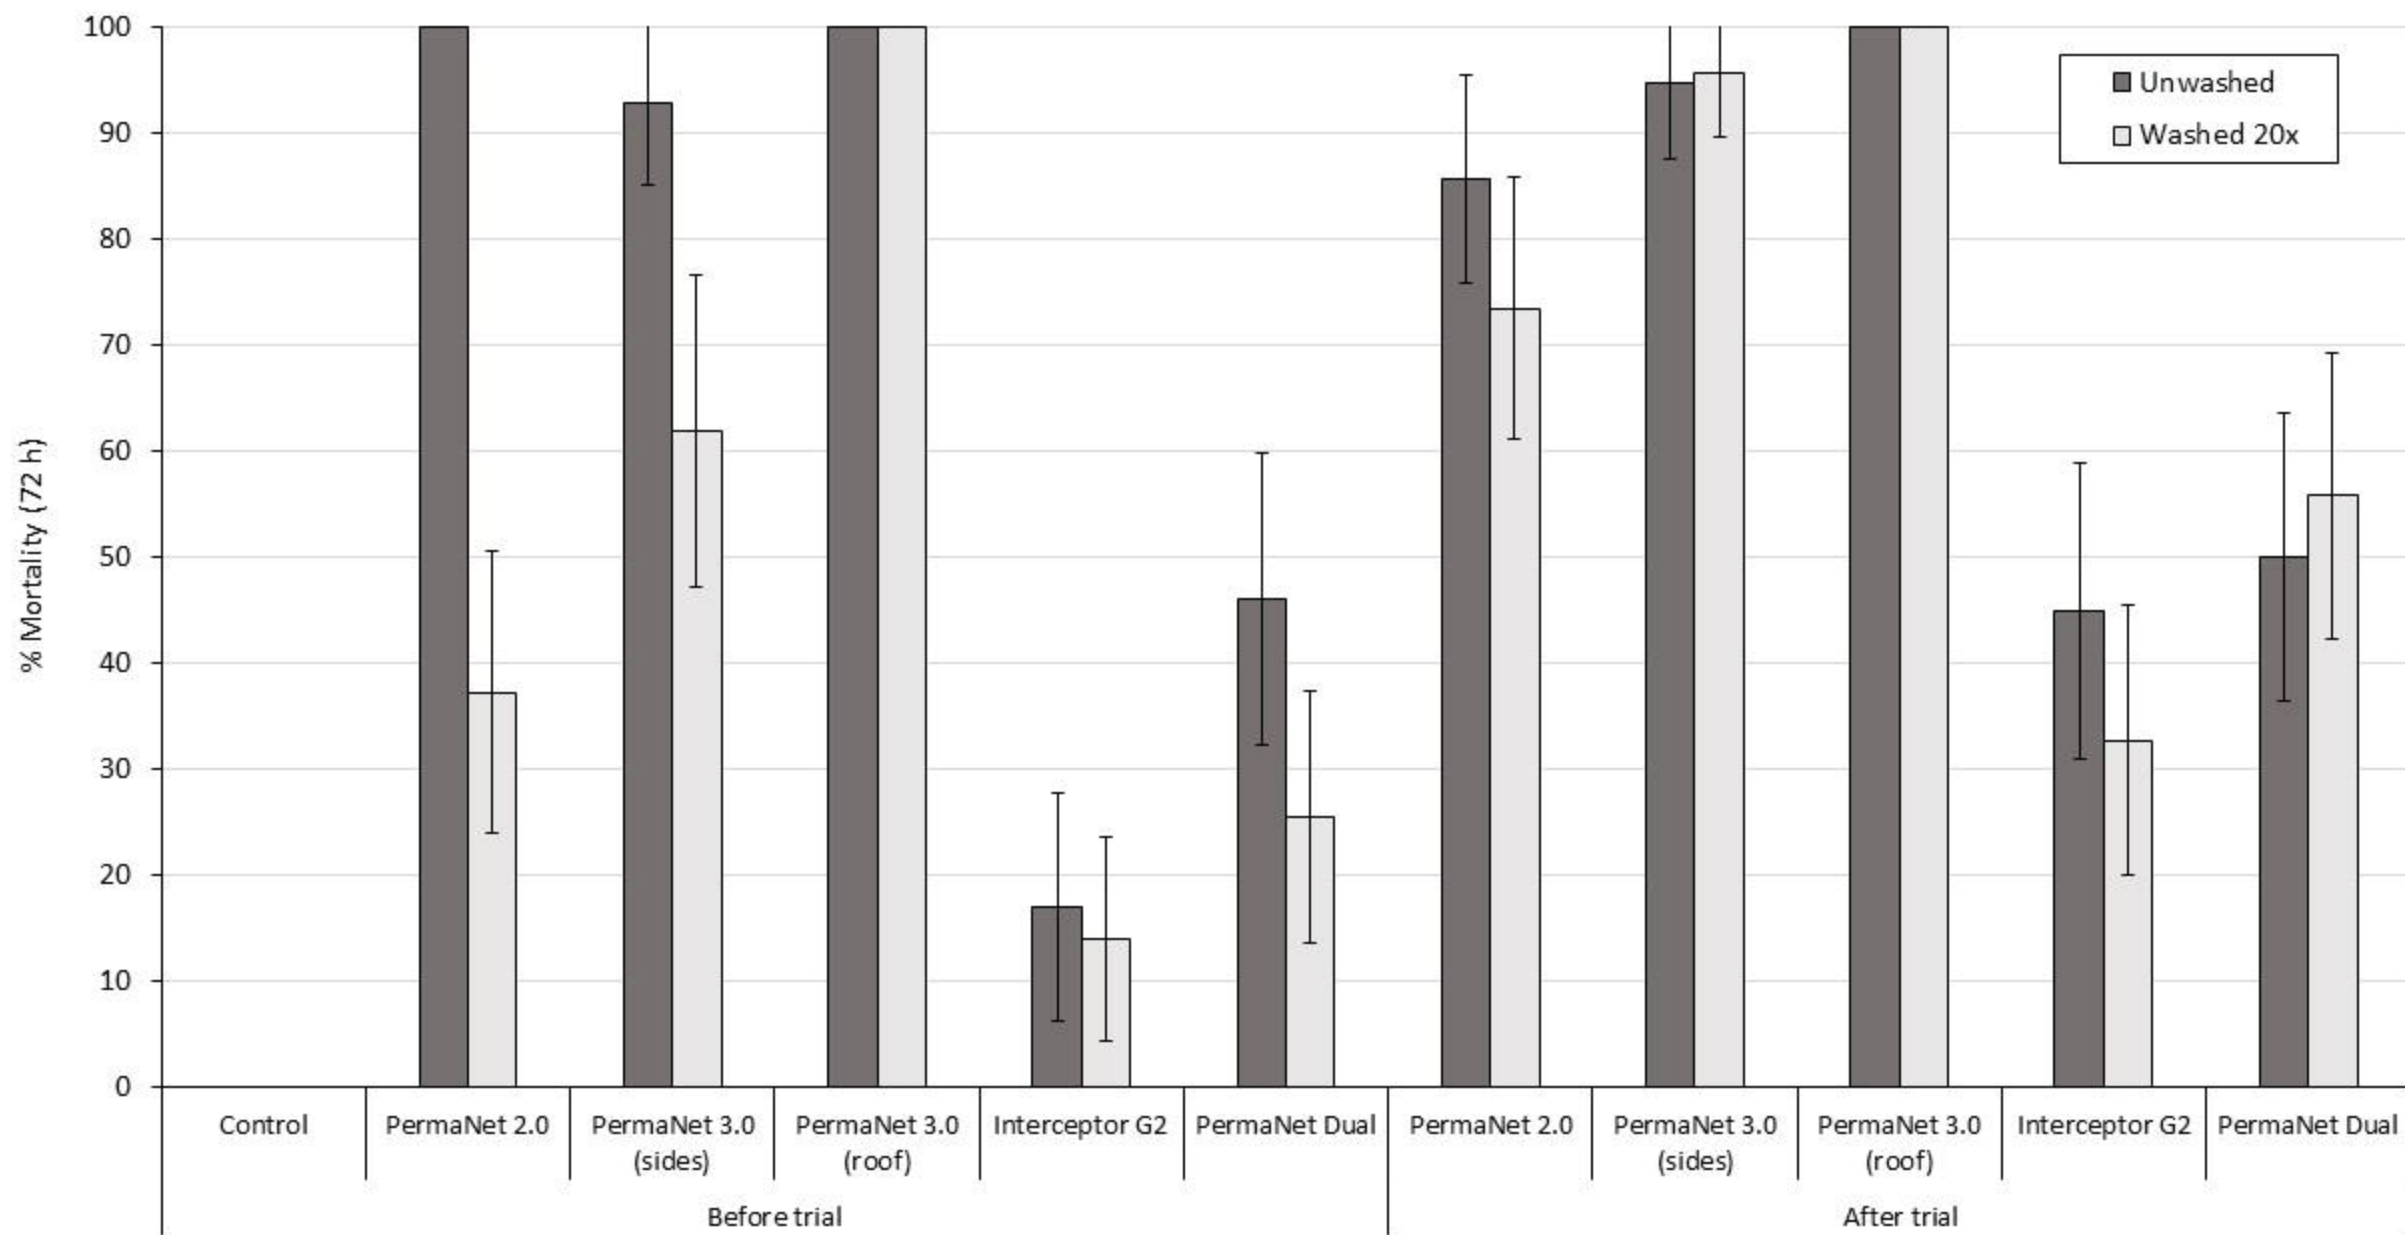

**A**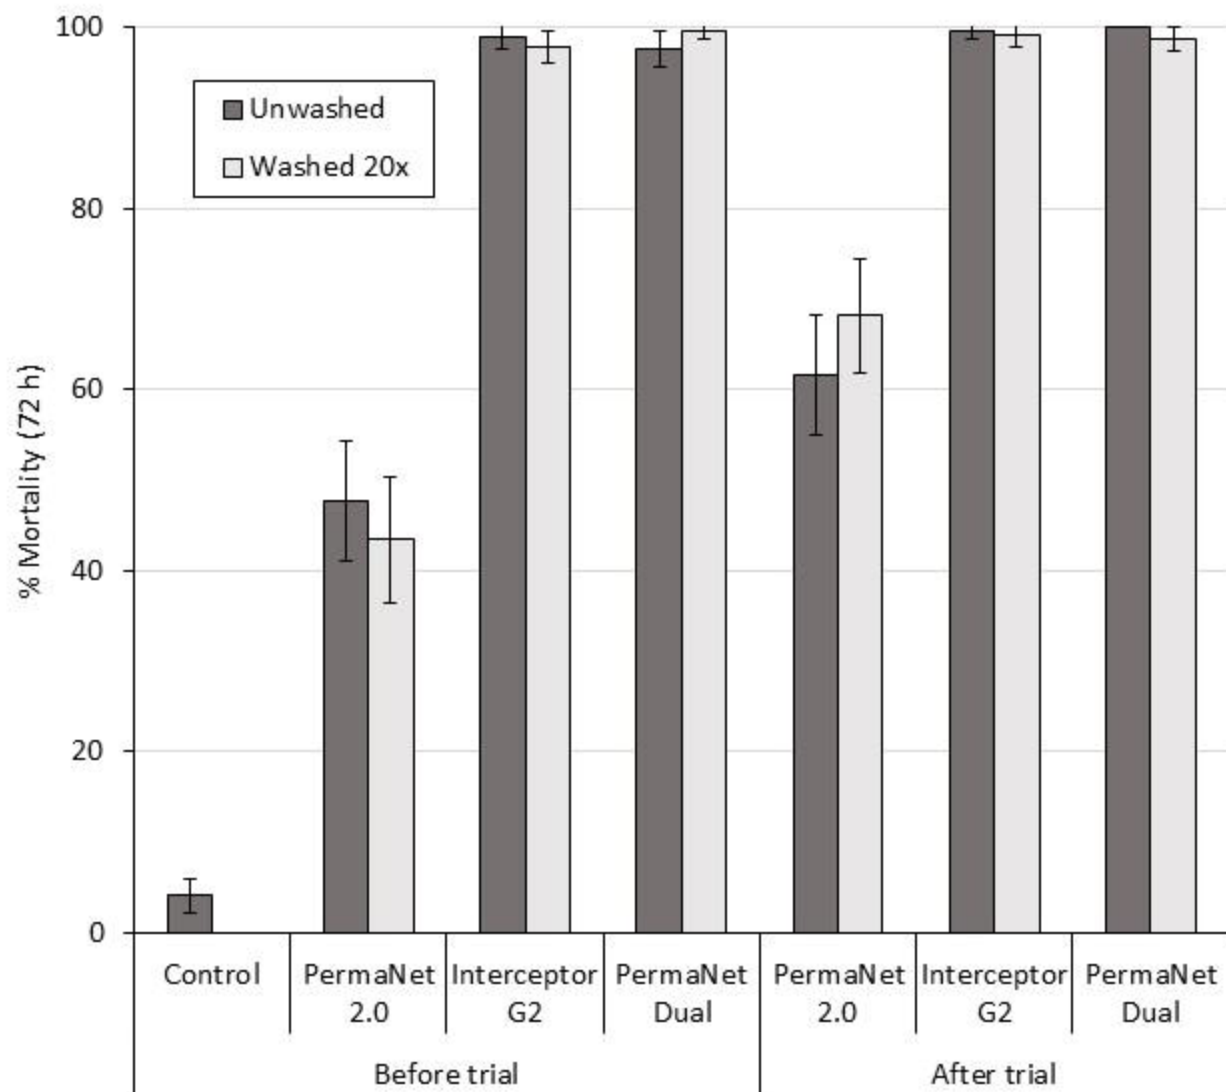**B**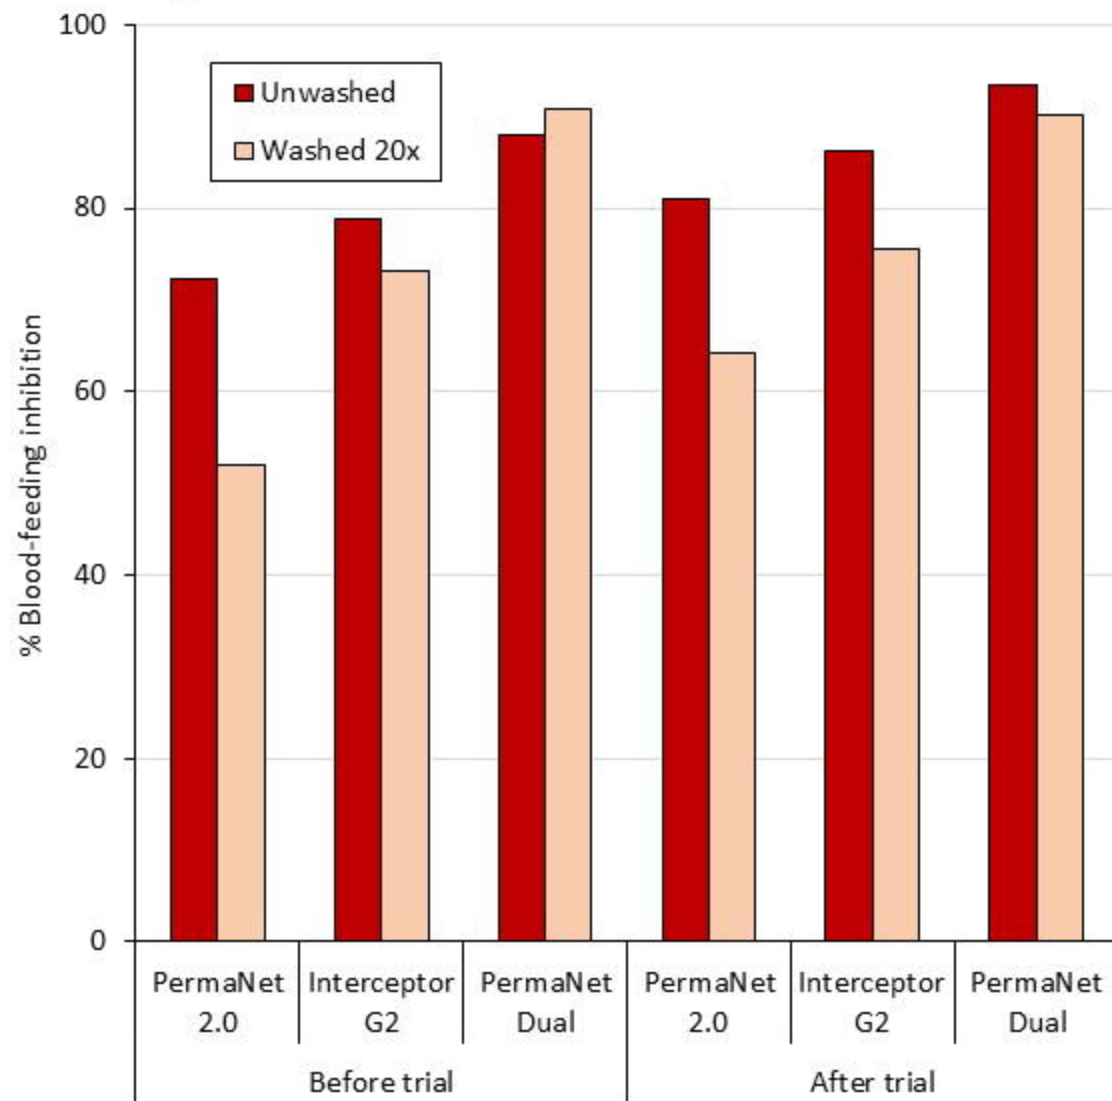

Source: https://www.biorxiv.org/content/10.1101/2023.02.02.526745v1.full.pdf
